# 1 Regulation of Ebola GP conformation and membrane binding by the chemical 2 environment of the late endosome

3 Aastha Jain<sup>1</sup>, Ramesh Govindan<sup>1,2</sup>, Alexander Berkman<sup>1</sup>, Jeremy Luban<sup>3,4</sup>, Natasha D.  
4 Durham<sup>1</sup>, James B. Munro<sup>1,4\*</sup>

5 <sup>1</sup>Department of Microbiology and Physiological Systems, UMass Chan Medical School, Worcester, MA,  
6 USA

7 <sup>2</sup>Medical Scientist Training Program, Tufts University School of Medicine, Boston, MA

8 <sup>3</sup>Program in Molecular Medicine, UMass Chan Medical School, Worcester, MA

9 <sup>4</sup>Department of Biochemistry and Molecular Biotechnology, UMass Chan Medical School, Worcester,  
10 MA

11 \*Correspondence: james.munro@umassmed.edu

12

## 13 Abstract

14 Interaction between the Ebola virus envelope glycoprotein (GP) and the endosomal membrane is an  
15 essential step during virus entry into the cell. Acidic pH, Ca<sup>2+</sup>, and removal of the glycan cap from GP  
16 have been implicated in mediating the GP-membrane interaction. However, the molecular mechanism  
17 by which these factors regulate the conformational changes that enable engagement of GP with the  
18 target membrane is unknown. Here, we apply fluorescence correlation spectroscopy (FCS) and single-  
19 molecule Förster resonance energy transfer (smFRET) to elucidate how the chemical environment of  
20 the late endosome promotes GP-membrane interaction, thereby facilitating virus entry. We first  
21 investigate the role of anionic phospholipids, phosphatidylserine (PS) and  
22 bis(monoacylglycero)phosphate (BMP), which are found in the membrane of the late endosome. We  
23 find that these lipids enable robust binding of GP to membranes in a pH- and Ca<sup>2+</sup>-dependent manner.  
24 We then identify residues in GP that sense pH and trigger conformational changes that make the  
25 fusion loop available for insertion into the membrane. Molecular dynamics (MD) simulations suggest  
26 the structural basis for pH-trigger conformational changes. We similarly confirm residues in the fusion  
27 loop that mediate GP's interaction with Ca<sup>2+</sup>, which likely promotes local conformational changes in  
28 the fusion loop and mediates electrostatic interactions with the anionic phospholipids. Collectively,  
29 our results provide a mechanistic understanding of how the environment of the late endosome  
30 regulates the timing and efficiency of virus entry.

31

## 32 Introduction

33 Ebola (EBOV) is an enveloped, negative-stranded RNA virus, which causes disease in humans with an  
34 average case fatality rate of 50% (Salata et al., 2019). Since its discovery, there have been several  
35 outbreaks of EBOV disease in sub-Saharan Africa with the most recent being in September 2022  
36 (“Ebola returns: back to square one”, 2022). Incidences of repetitive outbreaks, changes in virulence,  
37 or emergence of resistance could reduce the effectiveness of currently approved vaccination and  
38 treatment regimes. Therefore, a better understanding of the EBOV entry mechanism, an under-  
39 utilized drug target, would aid in the development of effective prophylactic and treatment  
40 interventions.

41 The EBOV fusion and entry process is not fully decoded. It is well known that the EBOV envelope  
42 glycoprotein (GP), present on surface of the virion, mediates virus entry in host cells. GP is a trimer of  
43 heterodimers with each protomer consisting of two subunits, GP1 and GP2, which are linked by  
44 disulfide bonds (J. E. Lee et al., 2008). The virions attach to the host cell surface via GP1 interaction  
45 with C-type lectins and phosphatidylserine receptors, and are internalized by macropinocytosis  
46 (Mulherkar et al., 2011; Nanbo et al., 2010). Once inside the endosomes, cathepsins B and L  
47 proteolytically remove the mucin-like domain and glycan cap from GP1, enabling its binding to the  
48 endosomal receptor, the Niemann-Pick C1 (NPC1) cholesterol transporter (Carette et al., 2011;  
49 Chandran et al., 2005; Côté et al., 2011; Miller et al., 2012). Additional factors yet to be identified are  
50 likely required to trigger the conformational changes in GP that are necessary to promote fusion of  
51 the viral and endosomal membranes (Fénéant et al., 2019).

52 While in the endocytic pathway, acidification of the endosomal lumen and  $\text{Ca}^{2+}$  play critical, but poorly  
53 defined roles in promoting EBOV entry (Brecher et al., 2012; Das et al., 2020; Nathan et al., 2020;  
54 Saeed et al., 2010; Sakurai et al., 2015). In a study conducted on the isolated GP fusion loop (residues  
55 507-560), conserved residues were mutated to identify pH sensors that trigger membrane binding (J.  
56 Lee et al., 2016). Mutation of H516 reduced lipid mixing promoted by the fusion loop by 80% in an *in*  
57 *vitro* assay. However, no difference in virus-like particle entry into mammalian cells could be seen with  
58 respect to wild type. This study suggested that instead of a single amino acid residue acting as a pH  
59 sensor, the effect of changes in pH is spread over multiple residues that collectively influence the  
60 conformational changes of GP. Another study investigated the interaction of  $\text{Ca}^{2+}$  ions with anionic  
61 residues flanking the fusion loop (Nathan et al., 2020). Residues D522 and E540 were especially crucial  
62 for interaction of the isolated fusion loop with  $\text{Ca}^{2+}$ , which enhances membrane binding. Our previous  
63 single-molecule Förster resonance energy transfer (smFRET) experiments on trimeric GP on the  
64 surface of pseudoviral particles demonstrated that low pH and  $\text{Ca}^{2+}$  play a critical role in promoting

65 conformational changes in GP that correlate with lipid mixing (Das et al., 2020). While prior studies  
66 had suggested residues in the fusion loop that are involved in sensing pH and  $\text{Ca}^{2+}$ , the role of these  
67 residues in mediating conformational changes of trimeric GP was not evaluated. Nor has it been  
68 determined how additional residues outside of the fusion loop might allosterically regulate  
69 conformational dynamics of GP and fusion loop-mediated membrane binding.

70 Lipids in host cell membranes can facilitate virus attachment and regulate fusion. Lipid content of  
71 endosomes is important in sorting of enveloped viruses into specific compartments and avoiding  
72 premature fusion (Mazzon & Mercer, 2014). The late endosomal membrane is rich in anionic lipids,  
73 phosphatidylserine (PS) and bis(monoacylglycero)phosphate (BMP) (Hullin-Matsuda et al., 2014;  
74 Urade et al., 1988). BMP is essential for fusion of viruses such as Dengue, Lassa, Uukuniemei and  
75 vesicular stomatitis virus that enter cells through the endocytic route (Bitto et al., 2016; Markosyan et  
76 al., 2021; Matos et al., 2013; Nour et al., 2013; Zaitseva et al., 2010). However, a role for BMP in EBOV  
77 GP entry could not be verified using a cell-cell fusion assay (Fénéant et al., 2019). This may indicate  
78 that the plasma membrane lacks other lipid or protein components, which are specific to the  
79 endosome and essential for EBOV GP-mediated fusion. Therefore, whether endosomal lipids play a  
80 role in EBOV entry remains an open question.

81 In the present study, we sought to elucidate the mechanistic basis for how the chemical features of  
82 the late endosome enable GP to engage the target membrane prior to fusion. To probe the ability of  
83 trimeric GP to bind membranes of distinct composition, we developed a fluorescence correlation  
84 spectroscopy (FCS) assay. FCS provides quantitative information on the diffusion of molecules in  
85 solution. In comparison to conventional pull-down or membrane flotation methods, FCS has high  
86 spatio-temporal resolution, requires low sample quantity, and provides rapid experimental  
87 throughput (Betaneli et al., 2019). Our results indicate that anionic lipids PS and BMP, enhanced the  
88 extent of membrane binding of GP at acidic pH and in presence of  $\text{Ca}^{2+}$ . smFRET imaging indicated that  
89 acidic pH and  $\text{Ca}^{2+}$  destabilized the pre-fusion conformation, allowing the fusion loop to move away  
90 from its hydrophobic cleft to a position where it can engage the membrane. The presence of the target  
91 membrane captured the fusion loop in a position distal to the base of the GP trimer. The results of  
92 mutagenesis support a model in which pH- and  $\text{Ca}^{2+}$ -sensing residues tune the responsiveness of GP  
93 to the chemical environment of the late endosome, ensuring proper timing of conformational changes  
94 necessary for fusion.

## 95 **Results**

### 96 ***Anionic lipids and $\text{Ca}^{2+}$ mediate GP-membrane binding at acidic pH***

97 We first sought to test the hypothesis that coordination of  $\text{Ca}^{2+}$  in the fusion loop of GP might aid in  
98 engagement of GP with anionic phospholipids found in the late endosome. To this end, we developed  
99 an FCS assay to monitor GP-membrane interactions. We prepared liposomes to mimic the endosomal  
100 membrane using phosphatidylcholine (PC), PS, BMP, and cholesterol (Ch). The trimeric ectodomain of  
101 GP (GP $\Delta$ TM) from the Mayinga strain of EBOV, lacking the transmembrane domain and the mucin-like  
102 domain was expressed and purified in Expi293 cells. A foldon trimerization domain was introduced at  
103 the C-terminus to preserve the trimeric form of GP $\Delta$ TM. GP1 and GP2 in GP $\Delta$ TM were site-specifically  
104 labelled with Cy5 using an enzymatic labelling approach (Materials and Methods) (Durham et al.,  
105 2020). We noted that thermolysin, which is commonly used to remove the glycan cap from GP1 in  
106 place of the endosomal cathepsin proteases, led to removal of the fluorophore. To alleviate this off-  
107 target effect of thermolysin, the thermolysin cleavage site was replaced with the HRV3C protease  
108 recognition sequence. This enabled equivalent removal of the glycan cap from GP1 (forming GP<sup>CL</sup>) and  
109 left the Cy5 labelling intact (**Figure S1A**). In a pseudovirion infectivity assay, introduction of the HRV3C  
110 sequence left GP 85% functional as compared to wild-type GP (**Figure S1B**).

111 As measured by FCS, the labelled GP<sup>CL</sup> diffused as a single homogeneous species with a diffusion time  
112 of  $0.308 \pm 0.007$  ms (**Figure 1A, B**). In contrast, 100-nm diameter liposomes diffused more slowly with  
113 a diffusion time of  $2.6 \pm 0.2$  ms, reflecting their larger size (**Figure 1C**). To allow labelled GP<sup>CL</sup> to bind  
114 liposomes under conditions that approximate the late endosome, GP<sup>CL</sup> was incubated with liposomes  
115 at 37°C for 20 mins at pH 5.5 across a range of  $\text{Ca}^{2+}$  concentrations. Evaluation with FCS indicated a  
116 mixture of two species with diffusion times consistent with unbound GP<sup>CL</sup>, and GP<sup>CL</sup> bound to  
117 liposomes. When liposomes were composed only of PC and cholesterol (PC:Ch 95:5) only  $4.8 \pm 0.1\%$   
118 of GP<sup>CL</sup> bound to liposomes in the absence of  $\text{Ca}^{2+}$  (**Figure 2**). With the addition of  $1 \mu\text{M}$   $\text{Ca}^{2+}$ , GP<sup>CL</sup>  
119 binding increased to  $7.9 \pm 0.2\%$ . Increasing  $\text{Ca}^{2+}$  concentration as high as 1 mM did not further promote  
120 GP<sup>CL</sup> binding to the liposomes.

121 In contrast, when we introduced negatively charged PS into the liposomes (PC:PS:Ch 55:40:5), GP<sup>CL</sup>  
122 binding increased to  $10.9 \pm 0.2\%$  in the absence of  $\text{Ca}^{2+}$ . Addition of  $\text{Ca}^{2+}$  at concentrations  $1 \mu\text{M}$  and  
123  $10 \mu\text{M}$  further increased GP<sup>CL</sup> binding to  $17.9 \pm 0.3\%$  and  $27.5 \pm 0.2\%$ , respectively. However, further  
124 increases in  $\text{Ca}^{2+}$  concentration to 0.1 mM and 1 mM, reduced GP<sup>CL</sup> binding by more than 1.3 and 4-  
125 fold, respectively. Next, we evaluated the effect of BMP, a negatively charged lipid unique to late  
126 endosomal membranes, on binding of GP<sup>CL</sup> to liposomes (Bissig & Gruenberg, 2013; Hullin-Matsuda  
127 et al., 2014). Liposomes designed to mimic the late endosome (PC:PS:BMP:Ch 40:40:15:5) (Bissig &  
128 Gruenberg, 2013) bound  $26.7 \pm 0.2\%$  of GP<sup>CL</sup> in the absence of  $\text{Ca}^{2+}$ . Gradually increasing  $\text{Ca}^{2+}$   
129 promoted GP<sup>CL</sup> binding to the liposomes, reaching a peak of  $52.0 \pm 0.3\%$  bound GP<sup>CL</sup> at 1 mM  $\text{Ca}^{2+}$ .



130 These data demonstrate that anionic lipids, especially BMP, promote GP<sup>CL</sup>-membrane interaction in a  
131 Ca<sup>2+</sup>-dependent manner.

132 Previous reports have shown that removal of the glycan cap and acidic pH are critical for trimeric GP  
133 to bind target membranes and promote lipid mixing in the absence of BMP (Brecher et al., 2012; Das  
134 et al., 2020). We therefore tested whether the presence of BMP affected the importance of glycan  
135 cap removal or pH during membrane binding. At neutral pH, 8 ± 1.7% GPΔTM bound to BMP-  
136 containing liposomes, with minimal increase in the presence of 1 mM Ca<sup>2+</sup> (**Figure 3A**). At pH 5.5,  
137 binding increased slightly to 18.3 ± 2%, with 1 mM Ca<sup>2+</sup> promoting binding further. GP<sup>CL</sup> bound  
138 liposomes at neutral pH to a similarly modest extent as GPΔTM, irrespective of Ca<sup>2+</sup>. Binding was  
139 increased by acidic pH and Ca<sup>2+</sup> to a greater extent than that seen for GPΔmuc, reasserting the  
140 significance of glycan cap cleavage in membrane binding of GP (**Figure 3B**). Taken together, these  
141 results demonstrate that neither anionic lipids nor Ca<sup>2+</sup> are sufficient to promote GP-membrane  
142 interactions at neutral pH. At acidic pH the combination of anionic lipids and Ca<sup>2+</sup> facilitates robust  
143 GP<sup>CL</sup> engagement with the membrane.

#### 144 ***Mutation of histidine residues in GP<sup>CL</sup> have differential effects on membrane binding***

145 We next tested the pH sensing potential of histidine residues in GP1 and GP2. Residues H139, H154,  
146 H197, H516 and H549 were selected. Residue H139 was selected since it is present in the NPC1-binding  
147 site of GP1. Similarly, H154 is proximal to the NPC1-binding site and interacts with hydrophobic  
148 residues in the fusion loop, potentially stabilizing the pre-fusion conformation (J. E. Lee et al., 2008).  
149 H197 resides adjacent to the glycan cap cleavage site near the C-terminus of GP1. Finally, H516 and  
150 H549 flank the fusion loop and have a functional role during lipid mixing *in vitro* (J. Lee et al., 2016).  
151 H39 was not included in our analysis as its location near the N terminus of GP1 and the lack of  
152 intramolecular interactions outside of its immediate proximity make it less likely to contribute to  
153 mediating the global conformation of GP. The following pKa values for the selected histidine residues  
154 were predicted by PropKa: 5.2 (H139), 5.2 (H154), 6.9 (H516) and 7.2 (H549), suggesting that the  
155 protonation state of these residues may change under physiological conditions, which encouraged us  
156 to experimentally test these residues as putative pH sensors (Olsson et al., 2011; Søndergaard et al.,  
157 2011). The predicted pKa for H39 was 8.3, further deemphasizing this residue as a potential sensor of  
158 physiological pH change. H197 is not present in the available GP structures and thus a predicted pKa  
159 was not calculated. We next introduced alanine substitutions at positions 139, 154, 197, 516, and 549  
160 in GP1 and GP2. The expression and structure of the mutant proteins was verified by western blot and  
161 ELISA using KZ52, an antibody specific to the native tertiary structure of GP (**Figure S2**) (J. E. Lee et al.,  
162 2008; Maruyama et al., 1999). GP-membrane interaction was evaluated using our FCS assay with

163 PC:PS:BMP:Ch liposomes since they yielded maximal binding of GP under the conditions tested. Of the  
164 five His mutants evaluated, H139A, H154A and H516A bound liposomes at approximately 10% at  
165 neutral pH, similarly to wild-type GP<sup>CL</sup> (**Figure 3C-G**). However, these mutants did not show increased  
166 membrane binding at acidic pH or in the presence of Ca<sup>2+</sup>. These data suggest that H139, H154, and  
167 H516 are critical to the pH-induced enhancement of GP-membrane interaction. In contrast, the H197A  
168 mutant bound liposomes similarly to wild-type across all conditions tested, indicating that H197 does  
169 not contribute to pH-induced membrane binding. H549A binding to liposomes remained similar to  
170 wild-type at neutral pH, and at acidic pH in the absence of Ca<sup>2+</sup>. However, the addition of Ca<sup>2+</sup> induced  
171 no additional membrane binding. This indicates that either Ca<sup>2+</sup> does not bind to the H549A mutant,  
172 or Ca<sup>2+</sup> binding does not induce the effect on GP structure that promotes interaction with the  
173 membrane. Furthermore, these data show that protonation of residues H197 and H549 is not  
174 necessary for pH-enhanced membrane binding.

#### 175 ***The putative Ca<sup>2+</sup>-binding site is essential for interaction with the target membrane***

176 A previous study demonstrated that Ca<sup>2+</sup> ions interact with conserved acidic residues (D522, E523,  
177 E540 and E545) flanking the fusion loop, suggesting an important role for these residues in EBOV  
178 fusion (Nathan et al., 2020). Here, we investigated whether these residues are similarly critical to  
179 membrane binding in the context of trimeric GP<sup>CL</sup>. Alanine substitutions were introduced at the  
180 putative site of Ca<sup>2+</sup> binding in the fusion loop. Protein expression and native conformation were  
181 evaluated as above. The D522A and E540A mutants were well expressed and maintained native  
182 antigenicity (**Figure S2**); E523A and E545A aggregated in solution and hence were not considered  
183 further. The D522A mutant bound to PC:PS:BMP:Ch liposomes to a comparable extent as wild-type  
184 GP<sup>CL</sup> at neutral pH with or without Ca<sup>2+</sup> (**Figure 3H**). Under acidic conditions binding was reduced (15  
185 ± 2%) and addition of Ca<sup>2+</sup> had no effect. In contrast, the membrane binding activity of E540A was  
186 similar to wild-type at acidic pH in the absence of Ca<sup>2+</sup> (30 ± 3%, **Figure 3I**). However, a reduction in  
187 membrane binding (13 ± 3%) was observed in the presence of Ca<sup>2+</sup>. These findings lend further support  
188 for the idea that acidic residues flanking the fusion loop play a critical role in Ca<sup>2+</sup>-mediated binding of  
189 GP to the target membrane.

#### 190 ***Conformational dynamics of wild-type GP<sup>CL</sup> during membrane binding***

191 We first sought to better characterize the conformational equilibrium of GP<sup>CL</sup> through smFRET imaging  
192 at neutral pH in the absence of Ca<sup>2+</sup>. We modified a previously established smFRET imaging assay that  
193 reports on conformational changes in GP2 (**Figure 4A, B**). We used pseudoparticles with GP containing  
194 the HRV3C cleavage site and a non-natural amino acid, *trans*-cyclooct-2-ene-L-lysine (TCO\*) at  
195 positions 501 and 610, which enabled labelling with Cy3- and Cy5-tetrazine. Advancements in single-

196 molecule detection allowed us to resolve additional FRET states beyond what had previously been  
197 reported (Materials and Methods). Hidden Markov modelling (HMM) of the individual smFRET traces  
198 indicated the existence of 4 states ( $0.24 \pm 0.08$ ,  $0.49 \pm 0.08$ ,  $0.72 \pm 0.08$ , and  $0.92 \pm 0.08$ ) (**Figure 4C**,  
199 **S4A**). The 0.92-FRET state (high FRET), which is consistent with the pre-fusion conformation reflected  
200 in structures of GP (J. E. Lee et al., 2008; Zhao et al., 2016), predominated with  $41 \pm 1\%$  occupancy at  
201 pH 7.5 in the absence of  $\text{Ca}^{2+}$  (**Figure 4D**). HMM analysis indicated spontaneous transitions among the  
202 other three FRET states and enabled construction of transition density plots (TDPs), which display the  
203 relative frequency of transitions between each FRET state (**Figure 4E**). The TDP indicates that most  
204 transitions occur in and out of the 0.92-FRET state, and between the 0.72- and 0.42-FRET states.  
205 Transitions to and from the 0.24-FRET state were comparatively rare. Acidification to pH 5.5 reduced  
206 the occupancy of the pre-fusion conformation to  $21 \pm 2\%$  and resulted in more frequent transitions in  
207 and out of the 0.24-FRET state (**Figure 4F**). Addition of 1 mM  $\text{Ca}^{2+}$  led to a further 2-fold reduction in  
208 pre-fusion occupancy to  $13 \pm 2\%$ , and further increase in transitions to and from the 0.24-FRET state  
209 (**Figure 4G**). Structures of GP in the pre-fusion conformation depict the fusion loop in a hydrophobic  
210 cleft in the neighbouring protomer within the trimer (J. E. Lee et al., 2008; Zhao et al., 2016). Given  
211 the sites of fluorophore attachment, we hypothesized that the low-FRET states (0.24 and 0.49 FRET)  
212 might reflect conformations in which the fusion loop was released from the hydrophobic cleft to  
213 positions where it can engage the target membrane. We therefore incubated the labelled  
214 pseudovirions with PC:PS:BMP:Ch liposomes at pH 5.5 in the presence of 1 mM  $\text{Ca}^{2+}$ , exactly as in our  
215 FCS experiments that indicated robust membrane binding. Interaction with liposomes further  
216 decreased occupancy in the pre-fusion conformation to  $5 \pm 2\%$  and increased the 0.24-FRET state  
217 occupancy to  $62 \pm 1\%$ . Overall dynamics decreased drastically with remaining transitions occurring in  
218 and out of the 0.24-FRET state (**Figure 4H**). Taken together, these data identify 0.24 FRET as indicating  
219 a  $\text{GP}^{\text{CL}}$  conformation that is enriched at pH 5.5 and  $\text{Ca}^{2+}$ , and further stabilized by interaction with a  
220 target membrane.

### 221 ***Conserved histidines mediate $\text{GP}^{\text{CL}}$ conformation at acidic pH***

222 Having identified histidine residues that are critical to GP-membrane interaction, we next sought to  
223 determine the role of these residues in mediating GP conformational changes using smFRET. Similar  
224 to wild-type  $\text{GP}^{\text{CL}}$ , the pre-fusion conformation (0.92 FRET) was predominant for H139A at pH 7.5 with  
225 an occupancy of  $37 \pm 1\%$ . However, unlike wild-type  $\text{GP}^{\text{CL}}$  the pre-fusion conformation occupancy of  
226 H139A was reduced only by about 30% at acidic pH (compared to 50% for wild-type) indicating a  
227 reduced sensitivity to pH (**Figure 5A**). Nonetheless, transitions to intermediate- and low-FRET states  
228 increased at acidic pH to a greater extent than wild-type, which correlates with the higher infectivity  
229 (**Figure S1C**). This indicates a maintained ability of H139A to undergo conformational changes (**Figure**

230 **4F, 5B**) but perhaps a greater dependence on NPC1 binding, which follows exposure to acidic pH in  
231 the endosome, for stabilization of functional conformations. The H154A mutant showed a more  
232 pronounced phenotype where its conformational equilibrium was insensitive to acidification, with a  
233 modest increase in transitions to low FRET (**Figure 5A, C**). While occupancy of the pre-fusion  
234 conformation remained at approximately 25% at both pH values tested, predominant occupancy was  
235 seen in the 0.49-FRET state (**Figure S4C**). Thus, while the H154A mutation destabilizes the pre-fusion  
236 conformation, the lack of sensitivity to acidic pH prevented access to a conformation competent for  
237 membrane binding. Taken together with the loss of infectivity of the H154A mutant (**Figure S1C**)  
238 (Manicassamy et al., 2005), these data support the identification of H154 as a critical sensor of acidic  
239 pH and mediator of GP conformation. Finally, consistent with H197 residing in an unstructured loop,  
240 not clearly engaged in intramolecular interactions, the H197A mutation had minimal impact on GP  
241 conformation or function as compared to wild-type at the pH tested (**Figure 5D, S1C, S4D**).

242 Two histidine residues in GP2, H516 and H549, had distinct effects on GP conformation. The H516A  
243 mutation induced a loss of sensitivity to changes in pH (**Figure 5A, E**), consistent with the observed  
244 dysfunction in membrane binding and lack of infectivity (**Figure S1C**). Similar to the H154A mutant, a  
245 slight increase in dynamics was seen and increased occupancy in the 0.49-FRET state (**Figure S4E**),  
246 further indicating that this conformation is not competent for membrane binding. These data support  
247 H516 also being a critical pH sensor and mediator of GP conformation. In contrast, the H549A mutant  
248 underwent significant destabilisation of the pre-fusion conformation upon exposure to acidic pH, as  
249 well as an increase in dynamics (**Figure 5A, F, S4F**). This observation correlates with the maintenance  
250 of membrane binding under acidic conditions (in the absence of  $\text{Ca}^{2+}$ ) and the modest decrease in  
251 infectivity (**Figure S1C**). Thus, these data suggest that, while H549 may sense changes in pH, it is not a  
252 determinant of global GP conformation.

### 253 ***Modulation of GP conformation by $\text{Ca}^{2+}$ -coordinating residues***

254 We next asked whether the coordination of  $\text{Ca}^{2+}$  impacts GP conformation as part of its role in enabling  
255 membrane binding. The D522A mutant, which is defective in  $\text{Ca}^{2+}$  coordination, membrane binding,  
256 and infectivity, demonstrated a conformational equilibrium similar to wild-type GP at neutral pH in  
257 the absence of  $\text{Ca}^{2+}$  (**Figure 6A**) (Nathan et al., 2020). A slight increase in dynamics was observed as  
258 compared to wild-type GP, suggestive of the mutation increasing mobility of the N terminus and fusion  
259 loop (**Figure 6B**). Acidification destabilized the pre-fusion conformation, consistent with the D522A  
260 mutation not affecting sensitivity to pH (**Figure S4G**). As expected, the addition of  $\text{Ca}^{2+}$  had no effect  
261 on the stability of the pre-fusion conformation (**Figure 6A**). In contrast, the E540A mutation, which  
262 maintains functionality in membrane binding in the absence of  $\text{Ca}^{2+}$ , showed a destabilized pre-fusion

263 conformation as compared to wild-type even at neutral pH, again suggestive of increased N terminus  
264 and fusion loop mobility. Acidification had minimal effect on the conformational equilibrium, although  
265 dynamics increased slightly. In particular, transitions in and out of the low-FRET state increased as  
266 seen for wild-type GP (**Figure 6C**). The addition of  $\text{Ca}^{2+}$  led to stabilization of the 0.72-FRET state,  
267 suggesting that adopting this conformation is not sufficient for membrane binding (**Figure S4H**). Taken  
268 together, these data on the D522A and E540A mutants clarify that coordination of  $\text{Ca}^{2+}$  is not critical  
269 for destabilizing the pre-fusion conformation. Rather, the importance of  $\text{Ca}^{2+}$  coordination likely  
270 comes at a later stage during interaction with the target membrane.

### 271 ***Structural basis for pH-induced conformational changes***

272 Finally, we investigated the structural basis for pH-induced conformational changes in GP<sup>CL</sup> using  
273 molecular dynamics (MD) simulation. We focused our attention on H154 and H516 as our  
274 experimental data implicated these residues in sensing changes in pH. We developed atomistic models  
275 of GP<sup>CL</sup> using available coordinates (Materials and Methods) (Bornholdt et al., 2016). In one model,  
276 histidine side chains were deprotonated to probe electrostatic interactions that would predominate  
277 at neutral pH. In an alternative model, histidine side chains were fully protonated to approximate the  
278 conditions of the acidic late endosome (pH 5-5.5). In both cases, the models were solvated in explicit  
279 water and charge-neutralized with ions. Following energy minimization and equilibration, we analysed  
280 the local dynamics in the proximity of H154 and H516 in a 225-ns simulation. The H154 side chain is  
281 engaged in electrostatic interactions with the side chain of E178, which contacts the receptor-binding  
282 site via interaction with R85. At the same time, the backbone carbonyl of H154 interacts  
283 electrostatically with the backbone amide N of Y534 in the fusion loop of the neighbouring protomer  
284 (**Figure 7A**). H154 thus provides a linkage between the receptor-binding site and the fusion loop,  
285 potentially stabilizing both regions in the pre-fusion conformation. According to our simulation,  
286 protonation of H154 strengthens the interaction with E178, which pulls H154 away from Y534. This  
287 movement destabilizes the H154-Y534 interaction, leading to greater relative movement of these  
288 residues (**Figure 7B**). The simulation, therefore, suggests that protonation of H154 contributes to  
289 release of the fusion loop from the hydrophobic cleft, facilitating its interaction with the target  
290 membrane. Mutation of H154 would break the linkage with E178, enabling stable contact with Y534  
291 across a range of pHs. The simulation thus provides a rationale for our experimental observation that  
292 the GP2 conformation of the H154A mutant showed decreased sensitivity to acidic pH.

293 H516 flanks the fusion loop and is engaged in Pi-Pi stacking interaction with the side chain of W104 in  
294 GP1. Here again, this interaction likely mediates the stability of the fusion loop in the pre-fusion  
295 conformation. Our MD simulation suggests that this interaction is labile when H516 is deprotonated,

296 with H516 sampling multiple conformations (**Figure 7C, D**). These dynamics can be parameterized by  
297 the distance between H516 and W104, and the  $\chi_2$  dihedral angle of the H516 side chain. Protonation  
298 of H516 stabilized the stacking interaction with W104, reducing the dynamics of H516 and selecting a  
299 single pre-existing conformation (**Figure 7E**). These data imply that GP1-GP2 interaction may be critical  
300 to GP2 conformational changes that remove the fusion loop from the hydrophobic cleft. The H516-  
301 W104 interaction may aid in ensuring proper positioning of the fusion loop for initial interaction with  
302 the membrane. This would likely require that GP1 is repositioned in response to acidic pH. Mutation  
303 of H516 may serve to decouple fusion loop release from putative GP1 movement.

## 304 **Discussion**

305 Previous studies indicate critical roles for acidic pH,  $\text{Ca}^{2+}$ , removal of the glycan cap, and NPC1 binding  
306 during EBOV entry and GP-induced membrane fusion (Brecher et al., 2012; Carette et al., 2011; Côté  
307 et al., 2011; Das et al., 2020; Gregory et al., 2011; Miller et al., 2012; Nathan et al., 2020; Sakurai et  
308 al., 2015). However, live-cell imaging and cell-cell fusion experiments have demonstrated that  
309 additional factors are necessary for completion of membrane fusion (Fénéant et al., 2019; Simmons  
310 et al., 2016; Spence et al., 2016). In the present study, using a new developed FCS assay to quantify  
311 the interactions between GP and liposomes, we show that endosomal anionic lipids, including PS and  
312 BMP, promote  $\text{Ca}^{2+}$ -dependent membrane binding of  $\text{GP}^{\text{CL}}$  at acidic pH. Under the conditions tested,  
313 membrane binding was optimal in the presence of both PS and BMP. It has been shown that  $\text{Ca}^{2+}$  binds  
314 to PS in phospholipid bilayers and reduces its overall surface charge, which could explain the reduction  
315 in binding of  $\text{GP}^{\text{CL}}$  with PC:PS:Ch liposomes at  $\text{Ca}^{2+}$  concentration higher than 10  $\mu\text{M}$  in our  
316 experimental setup (Martín-Molina et al., 2012; Melcrová et al., 2016). The additional presence of  
317 BMP in liposomes drastically increased  $\text{GP}^{\text{CL}}$ -membrane binding. Additionally, unlike PC:PS:Ch  
318 liposomes, increasing  $\text{Ca}^{2+}$  concentration did not limit interaction of  $\text{GP}^{\text{CL}}$  with PC:PS:BMP:Ch  
319 liposomes. Rather, an increase in  $\text{GP}^{\text{CL}}$  binding was observed with increasing  $\text{Ca}^{2+}$  concentration with  
320 maximal binding at 1 mM  $\text{Ca}^{2+}$ . Previous observations indicate that the unique structure of BMP alters  
321 the negative spontaneous curvature of membranes (Matsuo et al., 2004). Additionally, BMP increases  
322 the net surface charge of liposomes, enhancing their interaction with  $\text{Ca}^{2+}$  (Kobayashi et al., 2002).  
323 Both features of BMP may promote efficient interaction between  $\text{GP}^{\text{CL}}$  and the target membrane. In  
324 the latter case,  $\text{GP}^{\text{CL}}$  could preferentially interact with BMP via  $\text{Ca}^{2+}$  coordination within the fusion  
325 loop. Since BMP is exclusively present in the late endosome (Kobayashi et al., 2002), it could also  
326 regulate the timing of fusion of EBOV by avoiding pre-mature engagement of the fusion loop with a  
327 membrane prior to arrival in the late endosome. A similar dependence on BMP has been reported for  
328 other enveloped viruses such as Dengue virus, Lassa virus, vesicular stomatitis virus, and influenza  
329 virus (Mannsverk et al., 2022; Markosyan et al., 2021; Matos et al., 2013; Zaitseva et al., 2010).



330 Whether downstream events during EBOV fusion are also accelerated by BMP, as reported for Lassa  
331 virus, will be the topic of future studies (Markosyan et al., 2021).

332 The conformational changes in GP<sup>CL</sup> under conditions favourable for membrane binding were  
333 elucidated by a previously validated smFRET imaging assay developed in our lab, which reports on the  
334 movement of the N-terminus of GP2 (Das et al., 2020). In the present work, we show that acidification  
335 of pH followed by addition of Ca<sup>2+</sup> leads to a sequential destabilization of the pre-fusion conformation  
336 of GP<sup>CL</sup>. An increase in low FRET under the same conditions suggests movement of the N terminus.  
337 This change in FRET efficiency ( $\Delta$ FRET = 0.68) equates to an increase in the distance between the  
338 fluorophores of more than 30 Å. A movement of this magnitude likely also incorporates displacement  
339 of the fusion loop away from the hydrophobic cleft to a position that is competent for membrane  
340 binding. This interpretation is supported by our smFRET data acquired following incubation of GP<sup>CL</sup>  
341 with liposomes at acidic pH in the presence of Ca<sup>2+</sup>, which led to further destabilization of the high-  
342 FRET pre-fusion conformation, stabilization of the low-FRET conformation, and reduction of overall  
343 kinetics (**Figure 4B, C**). A structural description of the low-FRET conformation will require additional  
344 FRET pairs, which report more explicitly and with more sensitivity on the position of the fusion loop.  
345 The hypothesized extended pre-hairpin intermediate in which the heptad repeat helix 1 (HR1) has  
346 linearized may require repositioning or dissociation of GP1. Here again, additional FRET pairs that  
347 report on inter-domain dynamics will be beneficial. Whatever the precise structural description of the  
348 low-FRET state, our FCS and smFRET imaging results indicate that the extent of GP-membrane binding  
349 is inversely correlated (Spearman correlation  $r_s = -0.6813$ ,  $p = 0.0127$ ) with the occupancy of GP in the  
350 pre-fusion conformation (**Figure 8**).

351 Protonation of amino acid side chains is the driving force for inducing conformational changes in viral  
352 fusion proteins in response to acidification of pH. In particular, the role of histidine residues is well  
353 established in triggering membrane binding and fusion of influenza virus, Semiliki Forest virus, and  
354 human metapneumoviruses (Caffrey & Lavie, 2021; Harrison et al., 2013). Here, we report that  
355 residues H139, H154, H516 and H549 tune the responsiveness of EBOV GP to acidic pH through both  
356 stabilizing and destabilizing mechanisms. The membrane binding ability of H139A was reduced at  
357 acidic pH accompanied by poor destabilization of the pre-fusion conformation relative to wild type,  
358 indicating reduced ability to undergo pH-induced conformational changes in the absence of NPC1 *in*  
359 *vitro*. Nonetheless, H139A maintained greater infectivity than wild-type. This may be due to greater  
360 stability in the acidic endosome and given the proximity of H139 to the receptor-binding site, perhaps  
361 higher affinity for NPC1 inside cells. Mutants H154A and H516A emerged as the most important pH  
362 sensors. The membrane binding ability of both mutants was diminished at acidic pH and no difference  
363 in their FRET occupancies at neutral or acidic pH was observed. This indicates that the mutants are



364 insensitive to changes in pH and thus, functionally inactive (**Figure 5C, E**). Histidine residues can  
365 interact electrostatically with cationic amino acids such as lysine or arginine, forming His-Cat pairs,  
366 which are known to stabilize the pre-fusion conformations of several viral envelope glycoproteins  
367 (Harrison et al., 2013). These interactions are destabilized by protonation of histidines upon  
368 acidification, leading to repulsion between histidines and cationic amino acid, which contribute to  
369 triggering conformational changes necessary for viral fusion. In contrast, our MD simulation suggests  
370 that H154 and H516 are engaged in interactions not described by the His-Cat paradigm. These data  
371 indicate that protonation of H154 contributes to release of the fusion loop from its hydrophobic cleft  
372 through a stabilized interaction with E178. According to our analysis, the strengthened H154-E178  
373 interaction destabilizes backbone electrostatics between H154 and Y534 in the fusion loop of the  
374 neighbouring protomer. Similarly, protonation of H516 stabilizes Pi-Pi stacking interaction with W104  
375 in GP1. Thus, an inter-subunit interaction is strengthened under conditions that promote membrane  
376 binding. This interaction may mediate positioning and stability of the fusion loop and may indicate  
377 that GP1 remains associated with GP2 until after engagement with the target membrane. NPC1  
378 binding to GP1 may partially serve to localize EBOV on the endosomal membrane to increase the  
379 efficiency with which the fusion loop inserts into the membrane. At this point, an additional  
380 endosomal factor may be required to enable transition to the post-fusion conformation, which  
381 putatively requires dissociation of GP1.

382 Mutagenesis of H549 did not affect membrane binding or the extent of destabilization of the pre-  
383 fusion conformation of GP at acidic pH, indicating that it is less critical for mediating changes in the  
384 global conformation of GP. Additionally, membrane binding of H549A was insensitive to the presence  
385 of  $\text{Ca}^{2+}$ . This could be due to H549A attaining a local conformation that is unresponsive to  $\text{Ca}^{2+}$ . These  
386 results suggest that H549 more likely regulates the local conformation of the fusion loop, rather than  
387 the release from the hydrophobic cleft. Taken together, our data indicate that acidic pH destabilizes  
388 the interactions within GP1, and between GP1 and GP2 by direct side-chain protonation of key  
389 histidine residues, similar to influenza HA1 and HA2 (Caffrey & Lavie, 2021; Harrison et al., 2013).

390  $\text{Ca}^{2+}$  has been implicated in the fusion processes of Rubella virus, MERS-CoV, SARS-CoV-1 and -2, and  
391 EBOV (Dubé et al., 2014; Lai et al., 2017; Nathan et al., 2020; Singh et al., 2022; Straus et al., 2020).  
392  $\text{Ca}^{2+}$  can assist in membrane fusion through coordination by anionic residues in the fusion loop, as first  
393 seen for the Rubella virus E1 glycoprotein. This may stabilize a fusion loop conformation that is optimal  
394 for insertion into the membrane. In addition,  $\text{Ca}^{2+}$  coordination in the fusion loop can affect the  
395 physical properties of the target membrane in a manner that promotes fusion (Lai et al., 2017).  
396 Previous studies have shown that compounds that lead to accumulation of  $\text{Ca}^{2+}$  in endosomes inhibit  
397 EBOV entry, which indicates that EBOV fusion is highly sensitive to endosomal  $\text{Ca}^{2+}$  concentration (Das

398 et al., 2020; Johansen et al., 2013). *In vitro* studies have demonstrated that  $\text{Ca}^{2+}$  concentrations greater  
399 than 500  $\mu\text{M}$  are antagonistic to lipid mixing and fusion activity of Rubella virus, SARS-CoV-2, and EBOV  
400 (Das et al., 2020; Dubé et al., 2014; Singh et al., 2022). A previous study of the isolated fusion loop of  
401 EBOV GP highlighted the role of anionic residues, D522 and E540, in interaction with  $\text{Ca}^{2+}$  during  
402 membrane binding and lipid mixing (Nathan et al., 2020). Our findings support these conclusions and  
403 demonstrate that sensitivity of the native GP trimer to  $\text{Ca}^{2+}$ , and its ability to engage the target  
404 membrane in the presence of  $\text{Ca}^{2+}$ , is mediated by residues D522 and E540. The mutant D522A  
405 displayed destabilization of the pre-fusion conformation comparable to wild-type at acidic pH. Given  
406 the loss of membrane binding by the D522A mutant, these data indicate that acidification of pH is the  
407 major driver of global GP conformation, whereas  $\text{Ca}^{2+}$  binding may influence the local conformation  
408 of the fusion loop, enabling optimal insertion into the membrane. On the contrary, there was no  
409 significant change in the global conformation of E540A after acidification of pH. However, efficient  
410 membrane binding of E540A at acidic pH, coupled with an increase in the frequency of transitions,  
411 points toward a role for the target membrane in selecting conformations in E540A. Addition of  $\text{Ca}^{2+}$   
412 enriched the 0.72 FRET state, reduced both conformational transitions and membrane binding of  
413 E540A. These data suggest that  $\text{Ca}^{2+}$  still binds the fusion loop of the E540A trimer in such a manner  
414 that restricts the movement necessary for membrane binding. The NMR structure of the fusion loop  
415 in DPC micelles at acidic pH shows a 90° bend, which reduces the distance between residues D522 and  
416 H549, and between E540 and E545, bringing them within  $\sim 5 \text{ \AA}$  (Gregory et al., 2011). This could reflect  
417 a conformation that becomes accessible to the fusion loop after transitioning out of the hydrophobic  
418 cleft. The insensitivity of H549A to  $\text{Ca}^{2+}$  and its proximity to D522 at acidic pH in the NMR-derived  
419 structure might suggest that this conformation is stabilized by  $\text{Ca}^{2+}$ , perhaps through coordination by  
420 these pairs of residues. Structural studies of the intact trimer, performed under conditions that  
421 promote membrane fusion, are needed to elucidate the global GP conformation and the local fusion  
422 loop configuration that enables engagement with the target membrane. Biophysical interrogations  
423 such as those presented here should guide these future studies by identifying conditions that promote  
424 functional conformations and the residues that mediate their stability.

## 425 **Material and Methods**

### 426 ***Cell lines***

427 Expi293F cells (Gibco, ThermoFisher Scientific, Waltham, MA) were cultured in Expi293 expression  
428 medium in an orbital shaking incubator at 37°C, 8%  $\text{CO}_2$ , 125rpm. HEK293T FirB cells, which have high  
429 furin expression, were a kind gift from Dr. Theodore C. Pierson (Emerging Respiratory Virus section,  
430 Laboratory of Infectious Diseases, NIH, Bethesda, MD) (Mukherjee et al., 2014). These cells were  
431 cultured in DMEM (Gibco, ThermoFisher Scientific, Waltham, MA) with 10% cosmic calf serum

432 (Hyclone, Cytiva Life Sciences, Marlborough, MA) and 1% penicillin-streptomycin (Gibco,  
433 ThermoFisher Scientific, Waltham, MA) at 37°C, 5% CO<sub>2</sub>.

#### 434 **Plasmids**

435 pHLsec-GPΔTM and pMAM51-GPΔmuc plasmids were obtained from Dr. Kartik Chandran's lab  
436 (Einstein College of Medicine, NY). pHLsec-GPΔTM encodes EBOV (Mayinga) GP sequence (UniProt  
437 Q05320) with deleted mucin-like and transmembrane domains. A T4 fibritin foldon trimerization  
438 domain and 6X-histidine tag for Ni-NTA purification has been inserted into the C terminus. The A1  
439 (*GDSLDMLEWSLM*) and A4 (*DSL SMLEW*) peptides were introduced at positions 32 and 501 in GP1 and  
440 GP2, respectively, for site-specific labelling of GPΔTM, as previously described (Durham et al., 2020).  
441 pMAM51-GPΔmuc encodes full-length GP with the mucin-like domain deleted and was used for all  
442 pseudovirion experiments. In both GPΔTM and GPΔmuc the thermolysin cleavage site, *VNAT* at  
443 position 203, was replaced with an HRV3C protease recognition site (*LEVLFQGP*) by site directed  
444 mutagenesis (Q5 site directed mutagenesis kit, New England Biolabs, Ipswich, MA). All amino acid  
445 substitutions were also introduced in GPΔTM and GPΔmuc via site-directed mutagenesis.  
446 pNL4.3.Luc.R-E- used in infectivity assays was obtained through the NIH AIDS Reagent program  
447 (contributed by Dr. Nathaniel Landau, New York University School of Medicine) (He et al., 1995). An  
448 amber stop codon (TAG) in the *tat* gene was modified by site-directed mutagenesis to --TAA to prevent  
449 readthrough during incorporation of TCO\* for labelling of GPΔmuc. Plasmids PyIRS<sup>AF</sup> and eRF1 were  
450 provided by Dr. Edward Lemke (Johannes Gutenberg-University of Mainz, Germany).

#### 451 **Protein expression and purification**

452 For production of GPΔTM proteins (wild-type and mutants), Expi293F cells were transfected with  
453 pHLsec-GPΔTM using polyethyleneimine (PEI MAX, Polysciences, Warrington, PA) at a mass ratio of  
454 1:3 DNA:PEI MAX. As previously described, a 2:1 ratio of pHLsec-GPΔTM to tagged pHLsec-GPΔTM was  
455 transfected to ensure that GPΔTM trimers contained on average a single tagged protomer. The  
456 supernatants containing soluble GPΔTM proteins were harvested 5 days post-transfection. The  
457 proteins were purified using Ni-NTA agarose beads (Pierce, ThermoFisher Scientific, Waltham, MA).  
458 The protein was bound to the column in phosphate-buffered saline (PBS) containing 10mM imidazole,  
459 followed by washing with 20mM imidazole in PBS and elution in 200 mM imidazole containing PBS.  
460 Following purification, proteins were exchanged to labelling buffer (20 mM HEPES, 50 mM NaCl, pH  
461 7.5) using VivaSpin 6 concentrator (Sartorius AG, Gottingen, Germany).

#### 462 **Labelling of GPΔTM**

463 Wild-type and mutant GPΔTM proteins were labelled with 5 μM LD650 conjugated to coenzyme A  
464 (LD650-CoA; Lumidyne Technologies, New York, NY). The fluorophore was attached to the A1 and A4

465 peptides in the tagged GPΔ<sup>TM</sup> through incubation with 5 μM acyl carrier protein synthase (AcpS) in  
466 the labelling buffer with 10 mM Mg(CH<sub>3</sub>COO)<sub>2</sub> overnight at room temperature (Durham et al., 2020).  
467 The labelled proteins were subjected to overnight cleavage by exogenous furin (New England Biolabs,  
468 Ipswich, MA) at 37°C to fully convert GP0 to GP1 and GP2. The processed proteins were purified by  
469 size-exclusion chromatography on a Superdex 200 Increase 10/300 GL column (GE Healthcare,  
470 Chicago, IL). Purified, labelled proteins were concentrated using Amicon Ultra 30K filters  
471 (MilliporeSigma, Burlington, MA), aliquoted and stored at -80°C until further use. The concentration  
472 of proteins was determined using Bradford reagent.

#### 473 ***Indirect ELISA***

474 Labelled proteins were diluted to a final concentration of 5 μg/ml in PBS and coated onto the wells of  
475 a 96-well polystyrene plate (Pierce<sup>TM</sup>, ThermoFisher Scientific, Waltham, MA) by incubating overnight  
476 at 4°C. The plate was washed three times with PBST (PBS with 0.1% Tween-20) followed by blocking  
477 with 5% skim milk in PBST for 3h at room temperature. The blocking solution was removed, and the  
478 plate was again washed twice with PBST. Proteins were probed with KZ52 antibody (Durham et al.,  
479 2020; Maruyama et al., 1999) at a dilution of 1:1000 overnight at 4°C. The plate was then washed and  
480 incubated with horseradish peroxidase-conjugated anti-human IgG (Invitrogen<sup>TM</sup>, ThermoFisher  
481 Scientific, Waltham, MA) at a dilution of 1:2000 for 2h at room temperature. After washing the plate  
482 four times with PBST, TMB solution (3,3',5,5'-tetramethylbenzidine; ThermoFisher Scientific,  
483 Waltham, MA) was added to each well, incubated for 15 min, followed by addition of an equal volume  
484 of 2M sulphuric acid. The optical density was immediately read at 450 nm in a Synergy H1 microplate  
485 reader (BioTek, Winooski, VT).

#### 486 ***Liposome preparation***

487 The following lipids were used for liposome preparation: POPC (1-palmitoyl-2-oleoyl-glycero-3-  
488 phosphocholine), POPS (1-palmitoyl-2-oleoyl-sn-glycero-3-phospho-L-serine (sodium salt)), BMP  
489 (bis(monooleoylglycero)phosphate (S,R Isomer)) and cholesterol (all from Avanti Polar lipids,  
490 Alabaster, AL). Stock solution of lipids (10 mg/ml) were diluted at desired ratios in chloroform to obtain  
491 a final total lipid concentration of 1 mM. A lipid film was formed in a glass vial by evaporating the  
492 chloroform under a steady stream of Argon gas. Residual chloroform was removed by incubating the  
493 lipid film overnight under vacuum. Lipids were rehydrated with 5 mM HEPES, 10 mM MES and 150  
494 mM NaCl, pH 7.5, for 1 hour at room temperature. The lipid suspension was vortexed 5-7 times in 10  
495 sec pulses followed by 10 freeze-thaw cycles with liquid nitrogen. Liposomes were formed by  
496 extruding the lipid solution 37 times through a 100 nm polycarbonate membrane (Whatman®  
497 Nucleopore<sup>TM</sup> track-etched membrane) in a mini-extruder (Avanti Polar Lipids, Alabaster, AL). The size

498 of liposomes was verified using dynamic light scattering (Zetasizer Nano, Malvern Panalytical,  
499 Malvern, UK). The liposomes were stored at 4°C and used within a week.

#### 500 **HRV3C cleavage**

501 The glycan cap was removed from GPΔTM and pseudovirions with GPΔmuc through incubation with  
502 HRV3C protease (Pierce™, ThermoFisher Scientific, Waltham, MA) at 10°C for 16 hr. Cleavage of  
503 LD650-labelled GPΔTM was verified by in-gel fluorescence imaging of uncleaved and cleaved protein  
504 on a 4-20% polyacrylamide using a ChemiDoc™ MP imaging system (Bio-Rad, Hercules, CA) followed  
505 by Coomassie staining.

#### 506 **Fluorescence correlation spectroscopy**

507 For membrane binding studies, liposomes (500 μM total lipid) were incubated with 5 nM labelled  
508 GPΔTM in 5 mM HEPES, 10 mM MES, 150 mM NaCl (pH 7.5 or 5.5). For experiments performed in the  
509 absence of Ca<sup>2+</sup>, 1mM EDTA was included to chelate any Ca<sup>2+</sup> already bound to GPΔTM. Otherwise,  
510 the indicated concentration of CaCl<sub>2</sub> (0-1mM) was included in the incubation. The liposome-GPΔTM  
511 mixture was incubated at 37°C for 20 min to allow binding. For experiments performed at pH 5.5, the  
512 liposome mixture was acidified with 1 M HCl prior to addition of GPΔTM. FCS experiments were  
513 performed by dropping 50 μL of the liposome-GPΔTM mixture onto a coverslip (No. 1.5 Thorlabs,  
514 Newton, NJ). To prevent sticking of the protein-membrane complex to the glass surface, coverslips  
515 were plasma-cleaned followed by coating with 10% polyethylene glycol (PEG-8000, Promega,  
516 Madison, WI). 100 autocorrelation curves, 5 sec each in length, were recorded at room temperature  
517 using a 638 nm laser in a CorTector SX100 (LightEdge Technologies Ltd., Zhongshan City, China). The  
518 curves were fitted to the following model for two species diffusing in three dimensions with triplet  
519 blinking (Betaneli et al., 2019; Ducas & Rhoades, 2012; Rhoades et al., 2006):

520  $G(\tau) = G_{triplet}(\tau) \cdot G_{complex}(\tau)$ , where

521  $G_{triplet}(\tau) = 1 - T + T \cdot e^{-\frac{\tau}{\tau_{triplet}}}$ , and

$$522 \quad G_{complex}(\tau) = \frac{1}{N} \left( f \cdot \left[ 1 + \frac{\tau}{\tau_{protein}} \right]^{-1} \left[ 1 + \frac{\tau}{s^2 \tau_{protein}} \right]^{-1/2} + \alpha \cdot (1 - f) \right. \\ 523 \quad \left. \cdot \left[ 1 + \frac{\tau}{\tau_{liposome}} \right]^{-1} \left[ 1 + \frac{\tau}{s^2 \tau_{liposome}} \right]^{-1/2} \right)$$

524

525 where,  $N$  is the number of molecules in the confocal volume,  $f$  is the fraction of free protein,  $\alpha$  is the  
526 average brightness of the protein-liposome complex,  $\tau_{protein}$  is the diffusion time of free protein,  
527  $\tau_{liposome}$  is the diffusion time of the liposome, and  $s$  is the structural parameter, which reflects the

528 dimensions of the confocal volume. The diffusion times,  $\tau_{protein}$  and  $\tau_{liposome}$  were calculated by  
529 fitting the autocorrelation curves of GP $\Delta$ TM and liposomes (labelled with DiD) separately to single  
530 species diffusion models. The values of  $s$  and  $\tau_{protein}$  were kept constant to calculate the fraction of  
531 free and bound protein for all samples. Due to polydispersity of liposomes and fast photophysical  
532 dynamics of triplet blinking,  $\tau_{liposome}$  and  $\tau_{triplet}$  were allowed to vary during fitting. The analysis was  
533 carried out in MATLAB (MathWorks, Natick, MA) using a non-linear least-square curve fitting  
534 algorithm. All values were averaged over three independent experiments.

### 535 **Western blotting**

536 All proteins and pseudovirions were run on 4-20% denaturing polyacrylamide gels (Bio-Rad, Hercules,  
537 CA) and transferred to nitrocellulose membrane using Trans-blot Turbo (Bio-Rad, Hercules, CA).  
538 Membranes were rinsed with PBST, blocked with 5% skim milk in PBST for 1 h followed by probing of  
539 GP and p24 with monoclonal antibody (mAb) H3C8 at a dilution of 1:1000, (Ou et al., 2010) and mouse  
540 mAb B1217M at a dilution of 1:2000 (Genetex, Irvine, CA), respectively. The mAb H3C8 was humanized  
541 by cloning its variable heavy and light chain fragments in human IgG expression vectors obtained from  
542 Dr. Michel Nussenzweig (The Rockefeller University). Membranes were washed three times with PBST,  
543 incubated with horseradish peroxidase-conjugated anti-human IgG (Invitrogen<sup>TM</sup>, ThermoFisher,  
544 Waltham, MA) and anti-mouse IgG (ThermoFisher, Waltham, MA) for 1 h at room temperature and  
545 developed with SuperSignal<sup>TM</sup> West Pico PLUS chemiluminescent substrate (ThermoFisher Scientific,  
546 Waltham, MA).

### 547 **Infectivity assay**

548 Infectivity of VSV pseudovirions containing wild-type GP $\Delta$ muc was compared to pseudovirions  
549 containing GP $\Delta$ muc<sup>HRV3C</sup> via flow cytometry (Whitt, 2010). HEK293T cells were transfected with  
550 GP $\Delta$ muc and GP $\Delta$ muc<sup>HRV3C</sup> plasmid using polyethyleneimine (PEI MAX, Polysciences, Warrington, PA)  
551 at a mass ratio of 1:3 PEI MAX:DNA. Cells were transduced with VSV $\Delta$ G-GFP-VSVG pseudovirions 24 h  
552 after transfection. Supernatants containing VSV $\Delta$ G-GFP-GP $\Delta$ muc and VSV $\Delta$ G-GFP-GP $\Delta$ muc<sup>HRV3C</sup> were  
553 collected 24 h post-transduction and filtered through 0.45  $\mu$ m filter. As a negative control, bald  
554 particles were generated by transducing cells not expressing GP $\Delta$ muc. Vero cells were infected with  
555 VSV pseudovirions through incubation at 37°C for 1 h with gentle agitation every 15min to allow even  
556 spread of pseudovirions. Fresh media was added, and infection was allowed to proceed for five more  
557 hours. Cells were trypsinized and assayed for expression of GFP using a flow cytometer (MACSQuant  
558 Analyzer 1.0). The results were averaged across technical replicates and standard error was calculated  
559 from biological replicates.



560 To assess infectivity of GP $\Delta$ muc<sup>HRV3C</sup> mutants, pseudovirions with luciferase-expressing HIV-1 core  
561 were produced. Plasmids pMAM51-GP $\Delta$ muc<sup>HRV3C</sup> and pNL4.3.Luc.R-E- were co-transfected at a ratio  
562 of 1:5 in HEK 293T FirB cells. Pseudovirions were harvested 24 h post-transfection by collecting the  
563 supernatant, passing through a 0.45  $\mu$ m filter, and layering on 10% sucrose in PBS solution followed  
564 by ultracentrifugation at 25000 rpm for 2 h at 4°C. After resuspension of the pellet in PBS, particles  
565 were analyzed by western blot. The virions were cleaved with HRV3C to remove the glycan cap as  
566 above, incubated with Vero cells for 5 h at 37°C, followed by replacement of growth media. After 48  
567 h, cells were lysed with Glo Lysis Buffer (Promega, Madison, WI) for 5 min at room temperature.  
568 Luciferase activity was recorded by mixing equal volumes of cell lysate and Steady Glo Reagent  
569 (Promega, Madison, WI) and reading in a Synergy H1 plate reader (Biotek, Winooski, VT). The  
570 luminescence was normalized to expression of GP for each sample. Bald pseudovirions containing only  
571 pNL4.3.Luc.R-E- were used as a negative control.

### 572 ***Pseudovirion production and labelling for smFRET imaging***

573 To facilitate attachment of fluorophores to GP on the surface of pseudovirions for smFRET imaging,  
574 the non-natural amino acid TCO\* (SiChem GmbH, Bremen, Germany) was introduced at positions 501  
575 and 610 through amber stop codon suppression (GP\*) (**Figure 4B**) (Nikić et al., 2016). Pseudovirions  
576 were produced by transfecting HEK293T FirB cells with pMAM51-GP $\Delta$ muc<sup>HRV3C</sup> plasmids with and  
577 without amber stop codons at a 1:1 ratio, which equated to an excess of GP protein over GP\*. This  
578 ratio was optimized to ensure that the pseudovirions rarely contained more than a single GP\*  
579 protomer per particle. A plasmid encoding HIV-1 GagPol was also transfected to provide the  
580 pseudovirion core. To increase the efficiency of amber codon readthrough, plasmids eRF1 and PyIRS<sup>AF</sup>  
581 were also included in transfection (Das et al., 2020; Nikić et al., 2016). The supernatant containing  
582 pseudovirions was harvested 48 h post-transfection, filtered through a 0.45  $\mu$ m mixed cellulose ester  
583 membrane and layered onto 10% sucrose (in PBS) solution. The pseudovirions were pelleted by  
584 ultracentrifugation at 25000 rpm for 2 h at 4°C. Pseudovirions were resuspended in 500  $\mu$ L PBS and  
585 incubated with 500 nM Cy3- and Cy5-tetrazine (Jena Biosciences, Jena, Germany) for 30 min at room  
586 temperature. 60  $\mu$ M DSPE-PEG2000 biotin (Avanti Polar Lipids, Alabaster, AL) was added to the  
587 labelling reaction and incubated for another 30 min at room temperature with gentle mixing. The  
588 labelling reaction was layered on a 6-30% OptiPrep (Sigma-Aldrich, MilliporeSigma, Burlington, MA)  
589 density gradient and ultracentrifuged at 35000 rpm for 1 h at 4°C. Labelled pseudovirions were  
590 collected, aliquoted, and analyzed by western blot.

### 591 ***smFRET imaging assay and data analysis***



592 All smFRET experiments were performed following removal of the glycan cap from GP. Labelled and  
593 glycan cap-cleaved pseudovirions were immobilized on streptavidin-coated quartz slides and imaged  
594 on a wide-field prism-based TIRF microscope (Blakemore et al., 2021). Imaging was performed in the  
595 same buffer used for the membrane binding assay (5 mM HEPES, 10 mM MES, 150 mM NaCl [pH 7.5  
596 or 5.5]). To study the effect of Ca<sup>2+</sup>, the buffer was supplemented with 1 mM CaCl<sub>2</sub>. smFRET data was  
597 acquired at room temperature at 25 frames/sec using the MicroManager microscope control software  
598 (micromanager.org). Analysis of smFRET data was performed using the SPARTAN software package  
599 (<https://www.scottblanchardlab.com/software>) (Juetten et al., 2016) in MATLAB (MathWorks, Natick,  
600 MA). smFRET trajectories were selected according to the following criteria: acceptor fluorescence  
601 intensity greater than 35; FRET was detectable for at least 15 frames prior to photobleaching;  
602 correlation coefficient between donor and acceptor fluorescence traces was less than -0.4; signal-to-  
603 noise ratio was greater than 10; and background fluorescence was less than 50. Trajectories that met  
604 these criteria were further verified manually and fitted to a 5-state linear hidden Markov model  
605 (including a zero-FRET state) using maximum point likelihood (MPL) algorithm implemented in  
606 SPARTAN (Qin et al., 2000). The 5-state linear model was chosen based on the Akaike Information  
607 Criterion (AIC) and the Bayesian Inference Criterion (BIC) (**Figure S3**) (Akaike, 1974; Schwarz, 1978).  
608 Several models were initially considered with varying numbers of model parameters and topology.  
609 The 5-state linear model minimized both the AIC and BIC criteria relative to the models considered  
610 and was thus chosen for analysis. The idealizations from total number of traces for each sample were  
611 used to calculate the occupancies in different FRET states and construct the FRET histograms and  
612 transition density plots (TDPs).

### 613 **MD simulation**

614 A model of trimeric GP<sup>CL</sup> was generated from atomic coordinates determined through x-ray  
615 crystallography (PDB accession: 5JQ3) (Zhao et al., 2016). Models included residues 32-188 of GP1 and  
616 502-598 of GP2. Missing atoms, including hydrogens were added using pdb4amber. The protein  
617 components of the models were parameterized with the Amber forcefield (ff14SB). The systems were  
618 charge neutralized and solvated with the TIP3P explicit solvent model in LEaP. The solvated proteins  
619 were energy minimized for 0.1 ns, followed by equilibration using a stepwise protocol (Shi et al., 2008).  
620 Briefly, the protein backbone was harmonically constrained, with the constraints being released  
621 stepwise over 4 0.3-ns intervals. The simulations were then run for 225 ns in the NPT ensemble.  
622 Temperature and pressure were maintained using the Langevin thermostat and the Nose-Hoover  
623 Langevin barostat, respectively. Electrostatics were calculated using the Particle Mesh Ewald  
624 algorithm. All simulation steps were run using NAMD version 2.14 on the c3ddb cluster at the  
625 Massachusetts Green High Performance Computing Center.

626 **Acknowledgments**

627 The authors would like to thank Dr. Marco Díaz-Salinas (UMass Chan Medical School, Worcester, MA)  
628 for creating substitution mutations in *tat* in pNL4.3.Luc.R-E- plasmid used in the present study. We  
629 would also like to thank Dr. Gang Han (UMass Chan Medical School, Worcester, MA) for providing the  
630 facility of dynamic light scattering. This work was supported by NIH grants R01AI174645 and  
631 R01GM143773 to J.B.M, and R01AI148784 to J.L.

632 **References**

- 633 Akaike, H. (1974). A new look at the statistical model identification. *IEEE Transactions on Automatic*  
634 *Control*, 19(6), 716–723. <https://doi.org/10.1109/tac.1974.1100705>
- 635 Betaneli, V., Mücksch, J. & Schwille, P. (2019). Lipid-Protein Interactions, Methods and Protocols.  
636 *Methods in Molecular Biology*, 2003, 415–447. [https://doi.org/10.1007/978-1-4939-9512-7\\_18](https://doi.org/10.1007/978-1-4939-9512-7_18)
- 637 Bissig, C. & Gruenberg, J. (2013). Lipid Sorting and Multivesicular Endosome Biogenesis. *Cold Spring*  
638 *Harbor Perspectives in Biology*, 5(10), a016816. <https://doi.org/10.1101/cshperspect.a016816>
- 639 Bitto, D., Halldorsson, S., Caputo, A. & Huiskonen, J. T. (2016). Low pH and Anionic Lipid-dependent  
640 Fusion of Uukuniemi Phlebovirus to Liposomes\*. *Journal of Biological Chemistry*, 291(12), 6412–  
641 6422. <https://doi.org/10.1074/jbc.m115.691113>
- 642 Blakemore, R. J., Burnett, C., Swanson, C., Kharytonchyk, S., Telesnitsky, A. & Munro, J. B. (2021).  
643 Stability and conformation of the dimeric HIV-1 genomic RNA 5'UTR. *Biophysical Journal*, 120(21),  
644 4874–4890. <https://doi.org/10.1016/j.bpj.2021.09.017>
- 645 Bornholdt, Z. A., Ndungo, E., Fusco, M. L., Bale, S., Flyak, A. I., Crowe, J. E., Chandran, K. & Saphire, E.  
646 O. (2016). Host-Primed Ebola Virus GP Exposes a Hydrophobic NPC1 Receptor-Binding Pocket,  
647 Revealing a Target for Broadly Neutralizing Antibodies. *MBio*, 7(1), e02154-15.  
648 <https://doi.org/10.1128/mbio.02154-15>
- 649 Brecher, M., Schornberg, K. L., Delos, S. E., Fusco, M. L., Saphire, E. O. & White, J. M. (2012).  
650 Cathepsin Cleavage Potentiates the Ebola Virus Glycoprotein To Undergo a Subsequent Fusion-  
651 Relevant Conformational Change. *Journal of Virology*, 86(1), 364–372.  
652 <https://doi.org/10.1128/jvi.05708-11>
- 653 Caffrey, M. & Lavie, A. (2021). pH-Dependent Mechanisms of Influenza Infection Mediated by  
654 Hemagglutinin. *Frontiers in Molecular Biosciences*, 8, 777095.  
655 <https://doi.org/10.3389/fmolb.2021.777095>
- 656 Carette, J. E., Raaben, M., Wong, A. C., Herbert, A. S., Obernosterer, G., Mulherkar, N., Kuehne, A. I.,  
657 Kranzusch, P. J., Griffin, A. M., Ruthel, G., Cin, P. D., Dye, J. M., Whelan, S. P., Chandran, K. &  
658 Brummelkamp, T. R. (2011). Ebola virus entry requires the cholesterol transporter Niemann-Pick  
659 C1. *Nature*, 477(7364), 340–343. <https://doi.org/10.1038/nature10348>
- 660 Chandran, K., Sullivan, N. J., Felbor, U., Whelan, S. P. & Cunningham, J. M. (2005). Endosomal  
661 Proteolysis of the Ebola Virus Glycoprotein Is Necessary for Infection. *Science*, 308(5728), 1643–  
662 1645. <https://doi.org/10.1126/science.1110656>

- 663 Côté, M., Misasi, J., Ren, T., Bruchez, A., Lee, K., Filone, C. M., Hensley, L., Li, Q., Ory, D., Chandran, K.  
664 & Cunningham, J. (2011). Small molecule inhibitors reveal Niemann–Pick C1 is essential for Ebola  
665 virus infection. *Nature*, 477(7364), 344–348. <https://doi.org/10.1038/nature10380>
- 666 Das, D. K., Bulow, U., Diehl, W. E., Durham, N. D., Senjobe, F., Chandran, K., Luban, J. & Munro, J. B.  
667 (2020). Conformational changes in the Ebola virus membrane fusion machine induced by pH,  
668 Ca<sup>2+</sup>, and receptor binding. *PLoS Biology*, 18(2), e3000626.  
669 <https://doi.org/10.1371/journal.pbio.3000626>
- 670 Diseases, T. L. I. (2022). Ebola returns: back to square one. *The Lancet Infectious Diseases*.  
671 [https://doi.org/10.1016/s1473-3099\(22\)00678-8](https://doi.org/10.1016/s1473-3099(22)00678-8)
- 672 Dubé, M., Rey, F. A. & Kielian, M. (2014). Rubella Virus: First Calcium-Requiring Viral Fusion Protein.  
673 *PLoS Pathogens*, 10(12), e1004530. <https://doi.org/10.1371/journal.ppat.1004530>
- 674 Ducas, V. C. & Rhoades, E. (2012). Quantifying Interactions of  $\beta$ -Synuclein and  $\gamma$ -Synuclein with  
675 Model Membranes. *Journal of Molecular Biology*, 423(4), 528–539.  
676 <https://doi.org/10.1016/j.jmb.2012.08.008>
- 677 Durham, N. D., Howard, A. R., Govindan, R., Senjobe, F., Fels, J. M., Diehl, W. E., Luban, J., Chandran,  
678 K. & Munro, J. B. (2020). Real-Time Analysis of Individual Ebola Virus Glycoproteins Reveals Pre-  
679 Fusion, Entry-Relevant Conformational Dynamics. *Viruses*, 12(1), 103.  
680 <https://doi.org/10.3390/v12010103>
- 681 Fénéant, L., Wijs, K. M. S., Nelson, E. A. & White, J. M. (2019). An exploration of conditions proposed  
682 to trigger the Ebola virus glycoprotein for fusion. *PLoS ONE*, 14(7), e0219312.  
683 <https://doi.org/10.1371/journal.pone.0219312>
- 684 Gregory, S. M., Harada, E., Liang, B., Delos, S. E., White, J. M. & Tamm, L. K. (2011). Structure and  
685 function of the complete internal fusion loop from Ebolavirus glycoprotein 2. *Proceedings of the*  
686 *National Academy of Sciences*, 108(27), 11211–11216. <https://doi.org/10.1073/pnas.1104760108>
- 687 Harrison, J. S., Higgins, C. D., O’Meara, M. J., Koellhoffer, J. F., Kuhlman, B. A. & Lai, J. R. (2013). Role  
688 of Electrostatic Repulsion in Controlling pH-Dependent Conformational Changes of Viral Fusion  
689 Proteins. *Structure*, 21(7), 1085–1096. <https://doi.org/10.1016/j.str.2013.05.009>
- 690 He, J., Choe, S., Walker, R., Marzio, P. D., Morgan, D. O. & Landau, N. R. (1995). Human  
691 immunodeficiency virus type 1 viral protein R (Vpr) arrests cells in the G2 phase of the cell cycle  
692 by inhibiting p34cdc2 activity. *Journal of Virology*, 69(11), 6705–6711.  
693 <https://doi.org/10.1128/jvi.69.11.6705-6711.1995>
- 694 Hullin-Matsuda, F., Taguchi, T., Greimel, P. & Kobayashi, T. (2014). Lipid compartmentalization in the  
695 endosome system. *Seminars in Cell & Developmental Biology*, 31, 48–56.  
696 <https://doi.org/10.1016/j.semcd.2014.04.010>
- 697 Johansen, L. M., Brannan, J. M., Delos, S. E., Shoemaker, C. J., Stossel, A., Lear, C., Hoffstrom, B. G.,  
698 DeWald, L. E., Schornberg, K. L., Scully, C., Lehár, J., Hensley, L. E., White, J. M. & Olinger, G. G.  
699 (2013). FDA-Approved Selective Estrogen Receptor Modulators Inhibit Ebola Virus Infection.  
700 *Science Translational Medicine*, 5(190), 190ra79. <https://doi.org/10.1126/scitranslmed.3005471>

- 701 Juette, M. F., Terry, D. S., Wasserman, M. R., Altman, R. B., Zhou, Z., Zhao, H. & Blanchard, S. C.  
702 (2016). Single-molecule imaging of non-equilibrium molecular ensembles on the millisecond  
703 timescale. *Nature Methods*, 13(4), 341–344. <https://doi.org/10.1038/nmeth.3769>
- 704 Kobayashi, T., Beuchat, M.-H., Chevallier, J., Makino, A., Mayran, N., Escola, J.-M., Lebrand, C.,  
705 Cosson, P., Kobayashi, T. & Gruenberg, J. (2002). Separation and Characterization of Late  
706 Endosomal Membrane Domains\*. *Journal of Biological Chemistry*, 277(35), 32157–32164.  
707 <https://doi.org/10.1074/jbc.m202838200>
- 708 Lai, A. L., Millet, J. K., Daniel, S., Freed, J. H. & Whittaker, G. R. (2017). The SARS-CoV Fusion Peptide  
709 Forms an Extended Bipartite Fusion Platform that Perturbs Membrane Order in a Calcium-  
710 Dependent Manner. *Journal of Molecular Biology*, 429(24), 3875–3892.  
711 <https://doi.org/10.1016/j.jmb.2017.10.017>
- 712 Lee, J. E., Fusco, M. L., Hessel, A. J., Oswald, W. B., Burton, D. R. & Saphire, E. O. (2008). Structure of  
713 the Ebola virus glycoprotein bound to an antibody from a human survivor. *Nature*, 454(7201),  
714 177–182. <https://doi.org/10.1038/nature07082>
- 715 Lee, J., Gregory, S. M., Nelson, E. A., White, J. M. & Tamm, L. K. (2016). The Roles of Histidines and  
716 Charged Residues as Potential Triggers of a Conformational Change in the Fusion Loop of Ebola  
717 Virus Glycoprotein. *PLoS ONE*, 11(3), e0152527. <https://doi.org/10.1371/journal.pone.0152527>
- 718 Manicassamy, B., Wang, J., Jiang, H. & Rong, L. (2005). Comprehensive Analysis of Ebola Virus GP1 in  
719 Viral Entry. *Journal of Virology*, 79(8), 4793–4805. [https://doi.org/10.1128/jvi.79.8.4793-  
720 4805.2005](https://doi.org/10.1128/jvi.79.8.4793-4805.2005)
- 721 Mannsverk, S., Giraldo, A. M. V. & Kasson, P. M. (2022). Influenza Virus Membrane Fusion Is  
722 Promoted by the Endosome-Resident Phospholipid Bis(monoacylglycero)phosphate. *The Journal  
723 of Physical Chemistry. B*, 126(49), 10445–10451. <https://doi.org/10.1021/acs.jpcc.2c06642>
- 724 Markosyan, R. M., Marin, M., Zhang, Y., Cohen, F. S. & Melikyan, G. B. (2021). The late endosome-  
725 resident lipid bis(monoacylglycero)phosphate is a cofactor for Lassa virus fusion. *PLoS Pathogens*,  
726 17(9), e1009488. <https://doi.org/10.1371/journal.ppat.1009488>
- 727 Martín-Molina, A., Rodríguez-Beas, C. & Faraudo, J. (2012). Effect of calcium and magnesium on  
728 phosphatidylserine membranes: experiments and all-atomic simulations. *Biophysical Journal*,  
729 102(9), 2095–2103. <https://doi.org/10.1016/j.bpj.2012.03.009>
- 730 Maruyama, T., Rodriguez, L. L., Jahrling, P. B., Sanchez, A., Khan, A. S., Nichol, S. T., Peters, C. J.,  
731 Parren, P. W. H. I. & Burton, D. R. (1999). Ebola Virus Can Be Effectively Neutralized by Antibody  
732 Produced in Natural Human Infection. *Journal of Virology*, 73(7), 6024–6030.  
733 <https://doi.org/10.1128/jvi.73.7.6024-6030.1999>
- 734 Matos, P. M., Marin, M., Ahn, B., Lam, W., Santos, N. C. & Melikyan, G. B. (2013). Anionic lipids are  
735 required for vesicular stomatitis virus G protein-mediated single particle fusion with supported  
736 lipid bilayers. *The Journal of Biological Chemistry*, 288(18), 12416–12425.  
737 <https://doi.org/10.1074/jbc.m113.462028>
- 738 Matsuo, H., Chevallier, J., Mayran, N., Blanc, I. L., Ferguson, C., Fauré, J., Blanc, N. S., Matile, S.,  
739 Dubochet, J., Sadoul, R., Parton, R. G., Vilbois, F. & Gruenberg, J. (2004). Role of LBPA and Alix in

- 740 Multivesicular Liposome Formation and Endosome Organization. *Science*, 303(5657), 531–534.  
741 <https://doi.org/10.1126/science.1092425>
- 742 Mazzon, M. & Mercer, J. (2014). Lipid interactions during virus entry and infection. *Cellular*  
743 *Microbiology*, 16(10), 1493–1502. <https://doi.org/10.1111/cmi.12340>
- 744 Melcrová, A., Pokorna, S., Pullanchery, S., Kohagen, M., Jurkiewicz, P., Hof, M., Jungwirth, P., Cremer,  
745 P. S. & Cwiklik, L. (2016). The complex nature of calcium cation interactions with phospholipid  
746 bilayers. *Scientific Reports*, 6(1), 38035. <https://doi.org/10.1038/srep38035>
- 747 Miller, E. H., Obernosterer, G., Raaben, M., Herbert, A. S., Deffieu, M. S., Krishnan, A., Ndungo, E.,  
748 Sandesara, R. G., Carette, J. E., Kuehne, A. I., Ruthel, G., Pfeffer, S. R., Dye, J. M., Whelan, S. P.,  
749 Brummelkamp, T. R. & Chandran, K. (2012). Ebola virus entry requires the host-programmed  
750 recognition of an intracellular receptor. *The EMBO Journal*, 31(8), 1947–1960.  
751 <https://doi.org/10.1038/emboj.2012.53>
- 752 Mukherjee, S., Dowd, K. A., Manhart, C. J., Ledgerwood, J. E., Durbin, A. P., Whitehead, S. S. &  
753 Pierson, T. C. (2014). Mechanism and significance of cell type-dependent neutralization of  
754 flaviviruses. *Journal of Virology*, 88(13), 7210–7220. <https://doi.org/10.1128/jvi.03690-13>
- 755 Mulherkar, N., Raaben, M., Torre, J. C. de la, Whelan, S. P. & Chandran, K. (2011). The Ebola virus  
756 glycoprotein mediates entry via a non-classical dynamin-dependent macropinocytic pathway.  
757 *Virology*, 419(2), 72–83. <https://doi.org/10.1016/j.virol.2011.08.009>
- 758 Nanbo, A., Imai, M., Watanabe, S., Noda, T., Takahashi, K., Neumann, G., Halfmann, P. & Kawaoka, Y.  
759 (2010). Ebolavirus Is Internalized into Host Cells via Macropinocytosis in a Viral Glycoprotein-  
760 Dependent Manner. *PLoS Pathogens*, 6(9), e1001121.  
761 <https://doi.org/10.1371/journal.ppat.1001121>
- 762 Nathan, L., Lai, A. L., Millet, J. K., Straus, M. R., Freed, J. H., Whittaker, G. R. & Daniel, S. (2020).  
763 Calcium Ions Directly Interact with the Ebola Virus Fusion Peptide To Promote Structure–Function  
764 Changes That Enhance Infection. *ACS Infectious Diseases*, 6(2), 250–260.  
765 <https://doi.org/10.1021/acsinfecdis.9b00296>
- 766 Nikić, I., Girona, G. E., Kang, J. H., Paci, G., Mikhaleva, S., Koehler, C., Shymanska, N. V., Santos, C. V.,  
767 Spitz, D. & Lemke, E. A. (2016). Debugging Eukaryotic Genetic Code Expansion for Site-Specific  
768 Click-PAINT Super-Resolution Microscopy. *Angewandte Chemie International Edition*, 55(52),  
769 16172–16176. <https://doi.org/10.1002/anie.201608284>
- 770 Nour, A. M., Li, Y., Wolenski, J. & Modis, Y. (2013). Viral Membrane Fusion and Nucleocapsid Delivery  
771 into the Cytoplasm are Distinct Events in Some Flaviviruses. *PLoS Pathogens*, 9(9), e1003585.  
772 <https://doi.org/10.1371/journal.ppat.1003585>
- 773 Olsson, M. H. M., Søndergaard, C. R., Rostkowski, M. & Jensen, J. H. (2011). PROPKA3: Consistent  
774 Treatment of Internal and Surface Residues in Empirical pKa Predictions. *Journal of Chemical*  
775 *Theory and Computation*, 7(2), 525–537. <https://doi.org/10.1021/ct100578z>
- 776 Ou, W., Delisle, J., Konduru, K., Bradfute, S., Radoshitzky, S. R., Retterer, C., Kota, K., Bavari, S., Kuhn,  
777 J. H., Jahrling, P. B., Kaplan, G. & Wilson, C. A. (2010). Development and characterization of rabbit  
778 and mouse antibodies against ebolavirus envelope glycoproteins. *Journal of Virological Methods*,  
779 174(1–2), 99–109. <https://doi.org/10.1016/j.jviromet.2011.04.003>



- 780 Qin, F., Auerbach, A. & Sachs, F. (2000). A Direct Optimization Approach to Hidden Markov Modeling  
781 for Single Channel Kinetics. *Biophysical Journal*, 79(4), 1915–1927.  
782 [https://doi.org/10.1016/s0006-3495\(00\)76441-1](https://doi.org/10.1016/s0006-3495(00)76441-1)
- 783 Rhoades, E., Ramlall, T. F., Webb, W. W. & Eliezer, D. (2006). Quantification of  $\alpha$ -Synuclein Binding to  
784 Lipid Vesicles Using Fluorescence Correlation Spectroscopy. *Biophysical Journal*, 90(12), 4692–  
785 4700. <https://doi.org/10.1529/biophysj.105.079251>
- 786 Saeed, M. F., Kolokoltsov, A. A., Albrecht, T. & Davey, R. A. (2010). Cellular Entry of Ebola Virus  
787 Involves Uptake by a Macropinocytosis-Like Mechanism and Subsequent Trafficking through Early  
788 and Late Endosomes. *PLoS Pathogens*, 6(9), e1001110.  
789 <https://doi.org/10.1371/journal.ppat.1001110>
- 790 Sakurai, Y., Kolokoltsov, A. A., Chen, C.-C., Tidwell, M. W., Bauta, W. E., Klugbauer, N., Grimm, C.,  
791 Wahl-Schott, C., Biel, M. & Davey, R. A. (2015). Two-pore channels control Ebola virus host cell  
792 entry and are drug targets for disease treatment. *Science*, 347(6225), 995–998.  
793 <https://doi.org/10.1126/science.1258758>
- 794 Salata, C., Calistri, A., Alvisi, G., Celestino, M., Parolin, C. & Palù, G. (2019). Ebola Virus Entry: From  
795 Molecular Characterization to Drug Discovery. *Viruses*, 11(3), 274.  
796 <https://doi.org/10.3390/v11030274>
- 797 Schwarz, G. (1978). Estimating the Dimension of a Model. *The Annals of Statistics*, 6(2).  
798 <https://doi.org/10.1214/aos/1176344136>
- 799 Shi, L., Quick, M., Zhao, Y., Weinstein, H. & Javitch, J. A. (2008). The Mechanism of a  
800 Neurotransmitter:Sodium Symporter—Inward Release of Na<sup>+</sup> and Substrate Is Triggered by  
801 Substrate in a Second Binding Site. *Molecular Cell*, 30(6), 667–677.  
802 <https://doi.org/10.1016/j.molcel.2008.05.008>
- 803 Simmons, J. A., D'Souza, R. S., Ruas, M., Galione, A., Casanova, J. E. & White, J. M. (2016). Ebolavirus  
804 Glycoprotein Directs Fusion through NPC1 + Endolysosomes. *Journal of Virology*, 90(1), 605–610.  
805 <https://doi.org/10.1128/jvi.01828-15>
- 806 Singh, P., Mukherji, S., Basak, S., Hoffmann, M. & Das, D. K. (2022). Dynamic Ca<sup>2+</sup> sensitivity  
807 stimulates the evolved SARS-CoV-2 spike strain-mediated membrane fusion for enhanced entry.  
808 *Cell Reports*, 39(3), 110694. <https://doi.org/10.1016/j.celrep.2022.110694>
- 809 Søndergaard, C. R., Olsson, M. H. M., Rostkowski, M. & Jensen, J. H. (2011). Improved Treatment of  
810 Ligands and Coupling Effects in Empirical Calculation and Rationalization of pKa Values. *Journal of*  
811 *Chemical Theory and Computation*, 7(7), 2284–2295. <https://doi.org/10.1021/ct200133y>
- 812 Spence, J. S., Krause, T. B., Mittler, E., Jangra, R. K. & Chandran, K. (2016). Direct Visualization of  
813 Ebola Virus Fusion Triggering in the Endocytic Pathway. *MBio*, 7(1), e01857-15.  
814 <https://doi.org/10.1128/mbio.01857-15>
- 815 Straus, M. R., Tang, T., Lai, A. L., Flegel, A., Bidon, M., Freed, J. H., Daniel, S. & Whittaker, G. R.  
816 (2020). Ca<sup>2+</sup> Ions Promote Fusion of Middle East Respiratory Syndrome Coronavirus with Host  
817 Cells and Increase Infectivity. *Journal of Virology*, 94(13). <https://doi.org/10.1128/jvi.00426-20>

- 818 Urade, R., Hayashi, Y. & Kito, M. (1988). Endosomes differ from plasma membranes in the  
819 phospholipid molecular species composition. *Biochimica et Biophysica Acta (BBA) -*  
820 *Biomembranes*, 946(1), 151–163. [https://doi.org/10.1016/0005-2736\(88\)90468-3](https://doi.org/10.1016/0005-2736(88)90468-3)
- 821 Whitt, M. A. (2010). Generation of VSV pseudotypes using recombinant  $\Delta$ G-VSV for studies on virus  
822 entry, identification of entry inhibitors, and immune responses to vaccines. *Journal of Virological*  
823 *Methods*, 169(2), 365–374. <https://doi.org/10.1016/j.jviromet.2010.08.006>
- 824 Zaitseva, E., Yang, S.-T., Melikov, K., Pourmal, S. & Chernomordik, L. V. (2010). Dengue Virus Ensures  
825 Its Fusion in Late Endosomes Using Compartment-Specific Lipids. *PLoS Pathogens*, 6(10),  
826 e1001131. <https://doi.org/10.1371/journal.ppat.1001131>
- 827 Zhao, Y., Ren, J., Harlos, K., Jones, D. M., Zeltina, A., Bowden, T. A., Padilla-Parra, S., Fry, E. E. &  
828 Stuart, D. I. (2016). Toremifene interacts with and destabilizes the Ebola virus glycoprotein.  
829 *Nature*, 535(7610), 169–172. <https://doi.org/10.1038/nature18615>
- 830
- 831



832 **Figures**

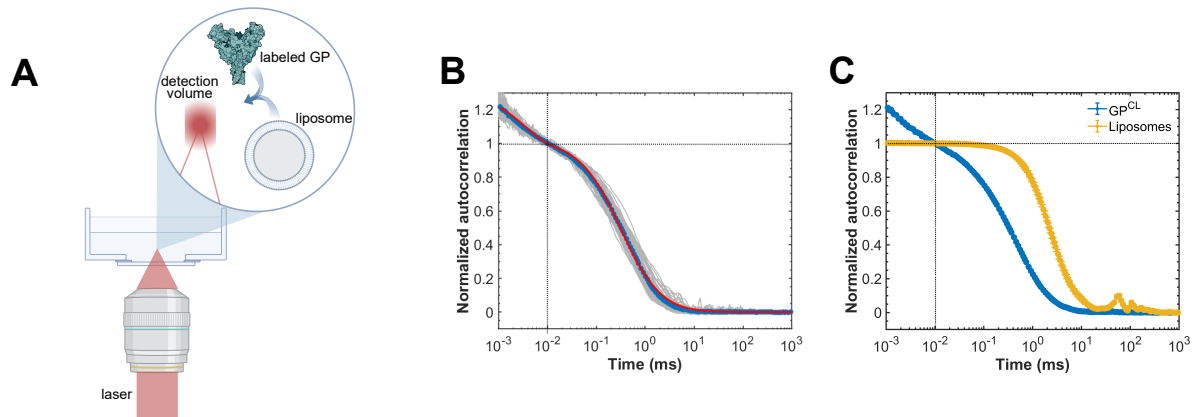

833 **Figure 1**

834 **Figure 1: FCS reports on GP-membrane interaction.** (A) Experimental setup of FCS assay for  
835 quantifying GP-membrane interactions. A confocal spot is positioned in a dilute solution of Cy5-  
836 labelled GP<sup>CL</sup> with or without liposomes. Fluorescent particles are detected upon diffusion through  
837 the confocal volume. (B) Autocorrelation data obtained from unbound Cy5-labelled GP<sup>CL</sup>. The  
838 autocorrelation of individual 5-sec fluorescence intensity traces was calculated (grey curves). The  
839 average of 100 autocorrelation curves was calculated (blue) and fitted to a model for a single species  
840 diffusing in 3 dimensions with a photophysical dynamics component (red). Accordingly, GP<sup>CL</sup> has a  
841 diffusion time of  $\tau_D = 0.308 \pm 0.007$  ms. Photophysical dynamics were observed below 10<sup>-2</sup> ms. (C)  
842 Autocorrelation curves comparing diffusion times of GP<sup>CL</sup> (blue) and liposomes (yellow). The diffusion  
843 time of liposomes is  $2.6 \pm 0.2$  ms, which is 8-fold longer than GP<sup>CL</sup>, allowing for identification of  
844 membrane-bound and unbound GP<sup>CL</sup> in solution.

845

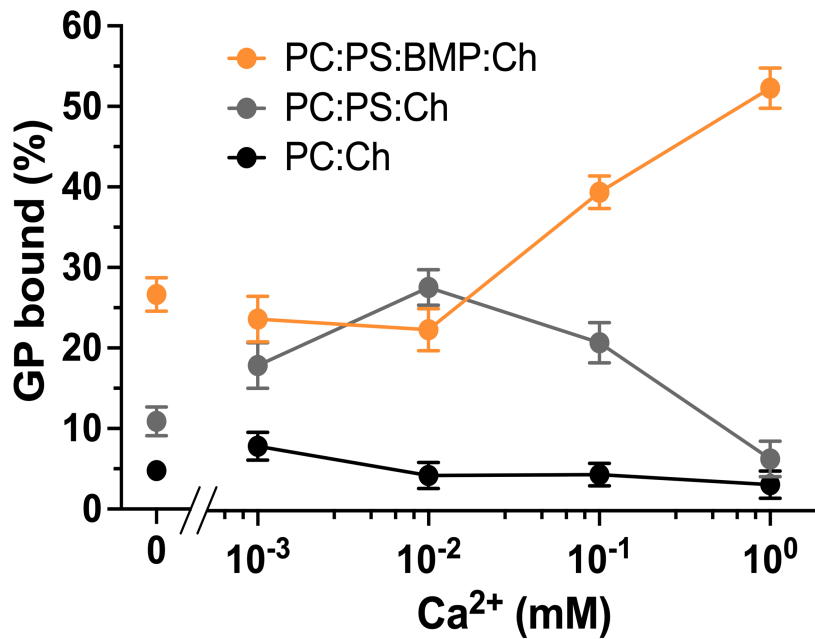

Figure 2

846

847 **Figure 2: Anionic phospholipids and Ca<sup>2+</sup> promote GP<sup>CL</sup>-membrane interaction.** The percentage of  
848 GP<sup>CL</sup> bound to liposomes was determined using the FCS assay depicted in **Figure 1A**. Autocorrelation  
849 data were obtained from a solution of Cy5-labelled GP<sup>CL</sup> and unlabelled liposomes and fit to a 3-  
850 dimensional diffusion for two species, membrane-bound and unbound GP<sup>CL</sup> with diffusion times of 0.3  
851 ms and 2.6 ms, respectively (Materials and Methods). Membrane binding to liposomes of varying lipid  
852 compositions was measured at pH 5.5 as a function of Ca<sup>2+</sup> concentration: PC:Ch (black circles),  
853 PC:PS:Ch (grey circles) and PC:PS:BMP:Ch (orange circles). Data points reflect the mean ± standard  
854 error determined from three sets of measurements.

855

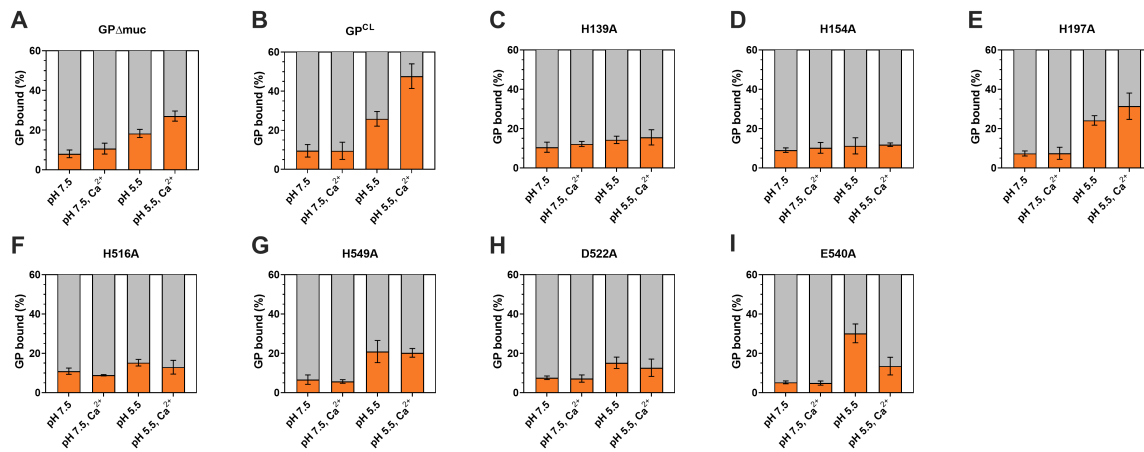

Figure 3

856

857 **Figure 3: Conserved histidines and acidic residues mediate GP-membrane interaction.** Membrane  
858 binding of (A) GPΔmuc, (B) GP<sup>CL</sup> to PC:PS:BMP:Ch liposomes at neutral and acidic pH in the presence  
859 or absence of 1 mM Ca<sup>2+</sup> is compared with the following mutants: (C) H139A, (D) H154A, (E) H197A,  
860 (F) H516A, (G) H549A, and (H) D522A, and (I) E540A, respectively. To ensure sensitivity to changes in  
861 the percentage of membrane binding of mutant GP<sup>CL</sup>, a total lipid concentration of 500 μM was used  
862 such that a maximum of 50% wild-type GP<sup>CL</sup> bound to liposomes at low pH in the presence of Ca<sup>2+</sup>. The  
863 mean and standard error were calculated from three independent experiments.

864

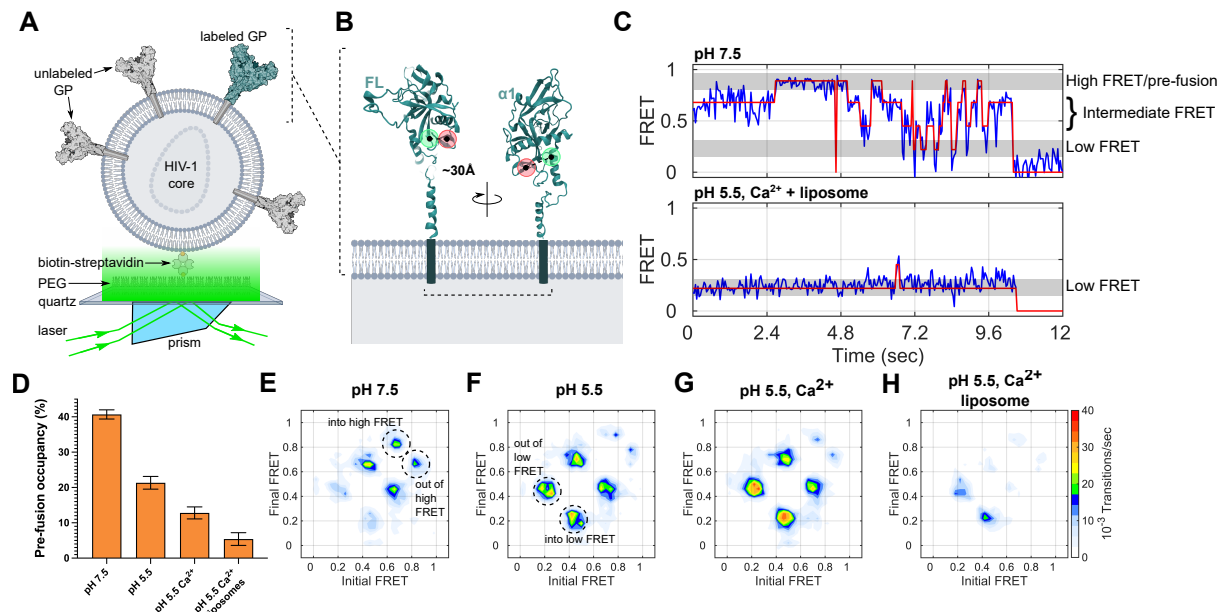

Figure 4

865

866 **Figure 4: Acidic pH, Ca<sup>2+</sup> and target membrane regulate GP conformational dynamics.** (A)  
 867 Experimental setup for smFRET imaging of pseudovirions labelled with the Cy3 and Cy5 FRET pair.  
 868 Labelled pseudovirions were immobilized on a PEG-coated quartz microscope slide via a biotin-  
 869 streptavidin covalent linkage and imaged using prism-based TIRF microscopy. (B) Fluorophore  
 870 attachment positions (red and green circles; residues 501 and 610 in GP2) indicated on a GP protomer  
 871 (PDB: 5JQ3). The indicated distance of 30 Å was previously determined through MD simulation of the  
 872 fluorophore-labelled trimer (Das et al., 2020). (C) Representative FRET trajectories (blue) of GP<sup>CL</sup>  
 873 overlaid with idealization (red) determined through HMM analysis. The trajectory acquired at pH 7.5  
 874 (top) shows transitions between the pre-fusion conformation (0.92 FRET), two intermediate-FRET  
 875 states (0.72 and 0.49), and a low-FRET state (0.24 FRET). In contrast, the FRET trajectory acquired in  
 876 the presence of liposomes at pH 5.5 and 1 mM Ca<sup>2+</sup> shows predominantly low FRET indicating a  
 877 conformation stabilized by the presence of a target membrane. (D) Pre-fusion high-FRET state (0.92  
 878 FRET) occupancy of GP<sup>CL</sup> determined under the indicated conditions through HMM analysis. The mean  
 879 and standard error were calculated from three independent experiments. TDPs displaying the relative  
 880 frequency of transitions of GP<sup>CL</sup> at (E) pH 7.5, (F) pH 5.5, (G) pH 5.5 with 1 mM Ca<sup>2+</sup>, and (H)  
 881 after incubation with PC:PS:BMP:Ch liposomes for 20 min at 37°C, at pH 5.5 and 1 mM Ca<sup>2+</sup>. Transitions into  
 882 and out of high- and low-FRET states are depicted in (E) and (F), respectively.

883

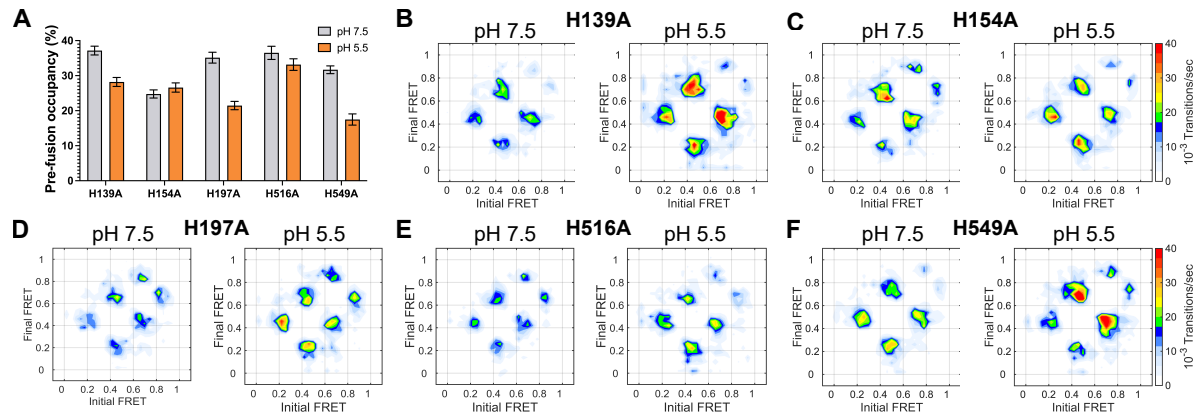

884

## Figure 5

885 **Figure 5: Conformational dynamics of GP histidine mutants.** (A) Pre-fusion high-FRET state occupancy  
886 of GP mutants, determined at pH 7.5 (grey bars) and pH 5.5 (orange bars). The mean and standard  
887 error were calculated from three independent experiments. TDPs indicating the relative frequency of  
888 conformational transitions at pH 7.5 and pH 5.5, as indicated, for (B) H139A, (C) H154A, (D) H197A, (E)  
889 H516A, and (F) H549A.

890

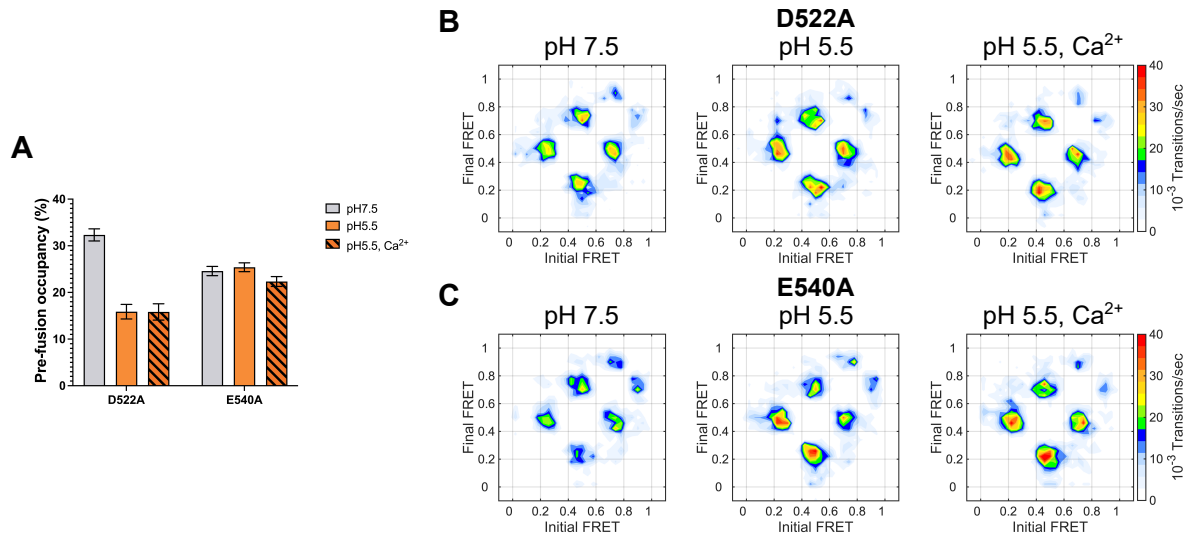

Figure 6

891

892 **Figure 6: Conformational dynamics of GP with mutations in putative Ca<sup>2+</sup>-coordinating residues. (A)**

893 Pre-fusion high-FRET state occupancy of GP mutants, determined at pH 7.5 (grey bars), pH 5.5 (orange

894 bars), and pH 5.5 with 1 mM Ca<sup>2+</sup> (orange striped bars). The mean and standard error were calculated

895 from three independent experiments. TDPs indicating the relative frequency of conformational

896 transitions determined under the indicated conditions for (B) D522A and (C) E540A.

897

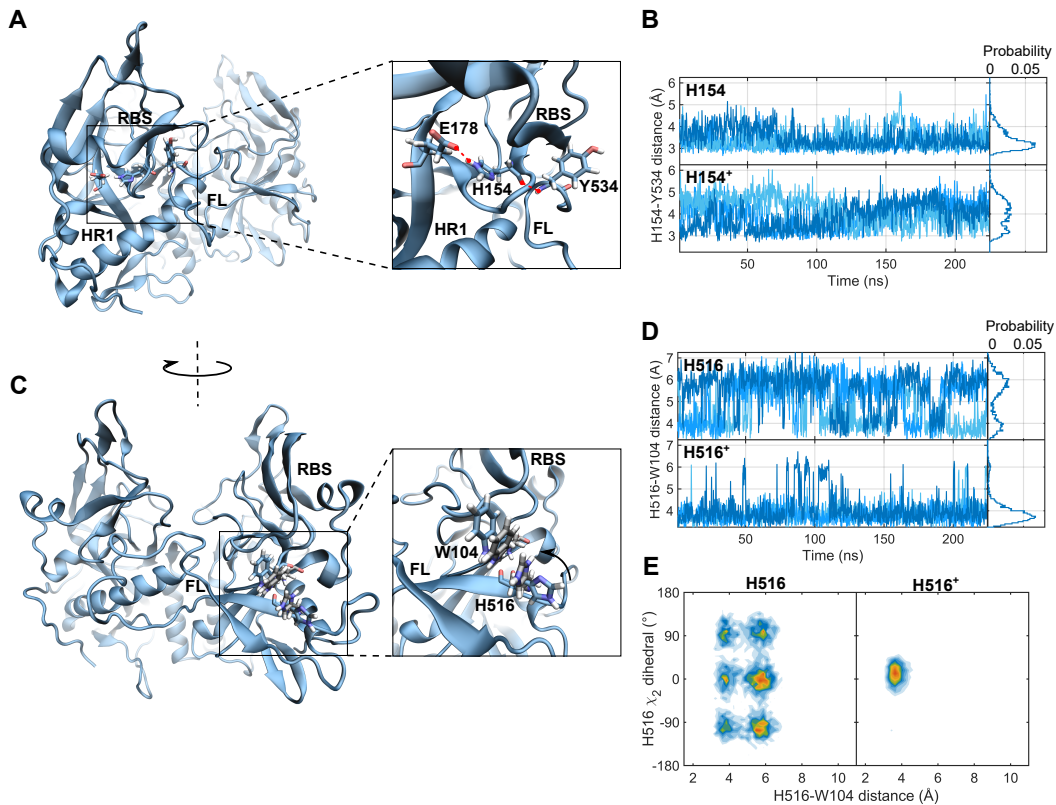

898

## Figure 7

899 **Figure 7: MD simulation provides molecular insights into pH-induced destabilisation of pre-fusion**  
 900 **GP. (A)** The simulation predicted electrostatic interactions between the side chains of H154 and E178,  
 901 as well as between the backbones of H154 and Y534 in the fusion loop of the neighbouring protomer  
 902 (red dotted lines). **(B)** The distances between the backbone N of H154 and the backbone carbonyl O  
 903 of Y534 for each of the three protomers in the GP trimer (three shades of blue) determined from the  
 904 simulation with (top) deprotonated histidines and (bottom) protonated histidines. Protonation of  
 905 H154 increases the relative motion of H154 and Y534 as a result of stabilized H154-E178 interaction.  
 906 **(C)** The simulation also predicts Pi-Pi stacking interaction between H516 in GP2 and W104 in GP1 with  
 907 both (blue residues) deprotonated and (grey residues) protonated H516. **(D)** Distance trajectories  
 908 indicating reduced H516-W104 distance under (top) deprotonated and (bottom) protonated  
 909 conditions for the three protomers in the trimer (three shades of blue). Protonation of H516 (grey  
 910 residues in (C)) stabilizes the interaction, drawing the two side chains into closer proximity. **(E)**  
 911 Bivariate histogram of H516-W104 distances and H516 side-chain dihedral angles under (left)  
 912 deprotonated and (right) protonated conditions. Fewer H516 conformations are available following  
 913 protonation.

914



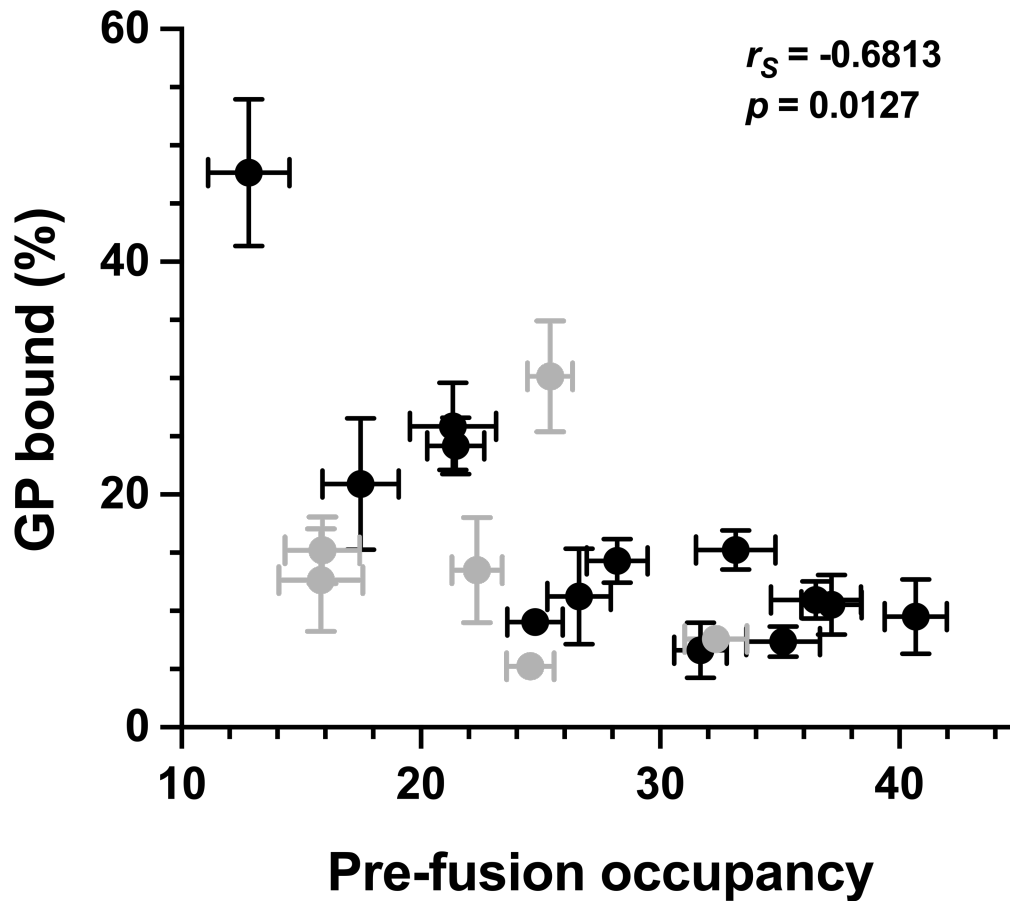

Figure 8

915

916 **Figure 8: GP occupancy in the pre-fusion high-FRET conformation is inversely correlated with the**  
917 **extent of membrane binding.** High-FRET state occupancy was determined through HMM analysis of  
918 smFRET trajectories. Membrane binding was determined by FCS. The non-parametric Spearman's  
919 correlation coefficient ( $r_s$ ) and associated  $p$ -value are indicated. Data for D522A and E540A (grey  
920 points) does not correlate with membrane binding and were excluded from the analysis.
